1     **Repetitive mild traumatic brain injury impairs resting state fMRI connectivity and alters**  
2                                   **protein profile signaling networks**

3  
4     Sakthivel Ravi<sup>a,b,c</sup>, Marangelie Criado-Marrero<sup>a,b,c</sup>, Daylin Barroso<sup>a,b,c</sup>, Isadora M Braga<sup>3</sup>,  
5     Mackenzie Bolen<sup>b,c</sup>, Uriel Rubinovich<sup>a,c</sup>, Gabriela P. Hery<sup>a,e</sup>, Matteo M Grudny<sup>d</sup>, John Koren  
6     III<sup>a,b,c</sup>, Stefan Prokop<sup>a,b,e,f</sup>, Marcelo Febo<sup>c,d</sup>, Jose Francisco Abisambra<sup>a,b,c,g \*</sup>

7     <sup>a</sup>Center for Translational Research in Neurodegenerative Disease, <sup>b</sup>Department of Neuroscience,  
8     <sup>c</sup>McKnight Brain Institute, <sup>d</sup>Department of Psychiatry, <sup>e</sup>Department of Pathology, <sup>f</sup>Fixel Institute  
9     for Neurological Diseases, <sup>g</sup>Brain Injury Rehabilitation and Neuroresilience (BRAIN) Center

10    University of Florida, Gainesville, FL 32610, USA

11

12

13

14

15

16    \*Correspondence:

17    Jose Francisco Abisambra

18    1275 Center Dr., BMS J491

19    University of Florida

20    Gainesville, FL 32610, USA

21    [j.abisambra@ufl.edu](mailto:j.abisambra@ufl.edu)

22

23

24

25

26

27 **Abstract**

28 Repetitive mild traumatic brain injury (rmTBI) is a leading and severe threat to cognition that  
29 often goes undiagnosed. A major challenge in developing diagnostics and treatments for the  
30 consequences of rmTBI is the fundamental knowledge gaps that explain how rmTBI promotes  
31 brain dysfunction. It is both critical and urgent to understand the neuropathological and  
32 functional consequences of rmTBI to develop effective therapeutic strategies. In this study, we  
33 sought to define the extent of altered brain functional connectivity (FC) and expression of  
34 neuropathological markers after rmTBI. We performed two rmTBI (2x 0.6□J impacts 24□h  
35 apart) in male and female C57BL/6J wild-type (WT) (~2.5-3mo) mice using closed head injury  
36 model of engineered rotational acceleration (CHIMERA) or sham procedures. At 5-6 days post-  
37 injury (dpi), we measured changes in brain volume and FC using T2-weighted images, resting-  
38 state functional MRI (rsfMRI), and graph theory analyses. We used diffusion tensor imaging  
39 (DTI) to assess microstructural changes in white matter tracts. In addition, at 7dpi, we measured  
40 changes in Iba1 and GFAP to determine the extent of gliosis. The expression of disease-  
41 associated protein markers in grey and white matter regions were evaluated using the  
42 NanoString-GeoMx digital spatial protein profiling (DSP) platform. The rsfMRI data revealed  
43 aberrant changes in connectivity such as node clustering coefficient, global and local efficiency,  
44 participation coefficient, eigenvector centrality, and betweenness centrality in thalamus and other  
45 key brain regions that process visual, auditory, and somatosensory information. In addition, DTI  
46 revealed significantly decreased fractional anisotropy (FA) and axial diffusivity in the optic tract.  
47 Also, mean, radial, and axial diffusivity (L1) were significantly increased in the hippocampus.  
48 DSP revealed that phospho-serine 199 tau (pS199) as well as glial markers such as GFAP,  
49 cathepsin-D, and Iba1 were significantly increased in the optic tract. In thalamic nuclei, the  
50 neuroinflammatory marker GPNMB was increased significantly, and the cell proliferation  
51 marker Ki-67 was decreased in the rmTBI group. Our data suggest that rmTBI significantly  
52 alters brain functional connectivity and causes a profound inflammatory response in gray matter  
53 regions, beyond chronic white matter damage.

54

55 **Keywords:** CHIMERA, repetitive mild TBI, diffusion tensor imaging, microglia, resting state  
56 fMRI, optic tract, thalamus.

57

58

## 59 **1. Introduction**

60 Repetitive mild traumatic brain injuries (rmTBI) are the most frequently diagnosed form  
61 of head injury in the United States [1–4]. These repetitive brain injuries result from multiple and  
62 subsequent impacting blows to the head, and they are common in subjects engaging in contact  
63 sports as well as by active military personnel. Moreover, evidence suggests that TBIs, and in  
64 particular rmTBIs, significantly increase risk for numerous neurodegenerative disorders,  
65 including chronic traumatic encephalopathy (CTE) and Alzheimer’s disease (AD), among other  
66 AD-related disorders (ADRD) [5–9]

67 The mechanisms linking rmTBIs and the pathogenesis of neurodegenerative disorders  
68 remain unknown. However, advances in monitoring both the anatomical and molecular changes  
69 that occur after rmTBI suggest links between TBI-induced brain alterations are detectable. For  
70 example, diffuse tensor imaging (DTI) in MRI identifies shears in white matter tracts that result  
71 in diffuse axonal injury (DAI), which is a typical sign of rmTBI [10]. In addition, increased  
72 expression of the microglial marker, Iba1 (ionized calcium-binding adapter molecule 1) and  
73 astrocytic marker, GFAP (glial fibrillary acidic protein) reflect gliosis response after injury.  
74 Though these network and molecular changes reveal considerable mechanistic information and  
75 can be found in TBIs of different severity, distinct markers of rmTBI are not clearly established.

76 In this study, we used functional brain imaging and digital spatial protein profiling to  
77 identify markers of altered neural function following rmTBI. Given that rmTBI causes rotational  
78 damage that ruptures white matter axonal tracts, we examined the effects of rmTBI on regions  
79 that possess high and low amount of white matter (optic tract and commissures and thalamic  
80 nuclei, respectively). Additionally, due to the purported link between TBI and cognitive damage,  
81 we examined brain structures highly involved in ADRDs (hippocampus and cortex). We

82 identified region-specific abnormalities resulting from rmTBI. These distinct imaging and  
83 protein surrogates of brain damage strongly suggest that, though the global consequences of  
84 rmTBIs are unpredictable, the local region-specific effects are consistent and are reflected at the  
85 gross structural and fine molecular levels. This information reveals novel imaging and protein  
86 biomarkers that could help determine outcomes and inform mechanistic knowledge gaps.

## 87 **2. Materials and Methods**

### 88 *2.1 Animals*

89 Male and female C57BL/6J (WT) mice were purchased from the Jackson Laboratory  
90 (Bar Harbor, ME, USA). Two to five mice of same-sex groups were housed in standard room  
91 conditions with 12 h light and dark cycle and allowed to access free food and water ad libitum.  
92 All the animal procedures were approved by the Institutional Animal Care and Use Committee  
93 (IACUC), University of Florida.

### 94 *2.2 Repetitive mild traumatic brain injury (rmTBI) by CHIMERA*

95 The rmTBI procedure was followed as suggested by Namjoshi et al. 2014[11]. 2.5-3  
96 months old male and female WT mice were subjected to two mild closed head injuries (0.6 J) at  
97 24h intervals using the Closed-Head Impact Model of Engineered Rotational Acceleration  
98 (CHIMERA) impactor. Briefly, mice were anesthetized with isoflurane (induction 3-4% and  
99 maintenance 1-2.5%), and lubricating eye ointment was applied to prevent corneal drying.  
100 Meloxicam (10 mg/kg) was administered subcutaneously right before injury for two days to  
101 alleviate pain. Animals were positioned supine in the holding bed of the impactor. The head was  
102 aligned in a flat position over a hole in the head plate to receive piston strikes closer to the  
103 bregma. After impact, animals were transferred immediately to the recovery chamber pre-  
104 warmed at 38°C and monitored until fully ambulatory. Sham mice were exposed to all these

105 procedures, except for the impact. At 7dpi, transcardial perfusions were performed with sterile  
106 ice-cold 0.9 % saline and the brain tissues were harvested. One half of the hemibrain was micro-  
107 dissected and stored at -80°C ultra-deep freezer for further analysis. The other half of the  
108 hemibrain was fixed in 10% neutral buffered formalin for further histological analysis.

### 109 *2.3 T2 and resting-state functional Magnetic Resonance Imaging (rsfMRI) data acquisition*

110 Anatomical T2-weighted, diffusion weighted and rsfMRI scans were collected between  
111 5-6 dpi. Sham and rmTBI mice were anesthetized with a mixture of isoflurane (Induction 4%,  
112 maintenance: 1%) and medical grade air (0.1-0.15L/min) and positioned prone on a custom-built  
113 holder with bed, ports for warm water flow, a bite bar and a nose port for gas anesthetic delivery.  
114 A respiratory pad was placed underneath the abdomen to monitor respiration throughout the  
115 entire imaging session. The core body temperature of the mice was maintained at 36-37°C by  
116 placing the circulating warm water setup connected to the water bath. Lubricating eye ointment  
117 was applied to prevent corneal drying, and a radiofrequency (RF) coil was placed on top of the  
118 head. The images were acquired using an 11.1T MRI scanner (Magnex Scientific Ltd, Oxford,  
119 UK) with high power gradient sets (RRI BFG-240/120-S7; maximum gradient strength of 1000  
120 mT/m at 325 Amps and a 200 ms rise time; RRI, Billerica, MA). The MRI system was controlled  
121 by a Bruker Paravision 6.01 console (Bruker BioSpin, Billerica, MA). A custom-made 2.0 cm x  
122 2.5 cm quadrature RF surface transmit/receive coil tuned to 470.7 MHz (1H resonance) was used  
123 for B1 excitation and signal detection (RF engineering lab, Advanced Magnetic Resonance  
124 Imaging and Spectroscopy Facility, Gainesville, FL). A T2- weighted Turbo Rapid Acquisition  
125 with Refocused Echoes (TurboRARE) sequence was acquired with the following parameters:  
126 effective echo time (TE) = 41.42 ms, repetition time (TR) = 4s, RARE factor =16, number of  
127 averages = 12, the field of view of 15 mm x 15 mm and 0.9 mm thick slice, a data matrix of 256

128 x 256 and 14 interleaved ascending coronal (axial) slices covering the entire brain from the  
129 rostral-most extent of the anterior frontal cortical surface, caudally towards the upper brainstem  
130 and cerebellum. The resting-state functional images were collected using a single-shot spin-echo  
131 echo planar imaging sequence with the following parameters: TE = 15 ms, TR = 2 s, 600  
132 repetitions, the field of view = 15 x 15 mm and 0.9 mm thick slice, and a data matrix of 64 x 48  
133 with 14 interleaved ascending coronal slices in the same space as the T2 anatomical. Two  
134 additional single repetition SE-EPI scans were collected, one with phase encode gradient lobes  
135 ('PE blips') collected along the positive gradient direction and the other collected with PE blips  
136 reversed to the negative PE direction (Bruker Paravision binary method for distortion correction  
137 is kindly provided by Dr. Matthew Budde, Medical College of Wisconsin).

#### 138 *2.4 rsfMRI image pre-processing*

139 Functional connectivity of rmTBI mice brain was analyzed by graph theoretical analysis, an  
140 approach highly used to assess novel biomarkers of brain function in neurological diseases and  
141 aging [12]. SE-EPI distortions were corrected using TOPUP in FSL [13]. The pair of opposite  
142 phase-encode blip scans were used to estimate the susceptibility-induced off-resonance field,  
143 which is used to unwarp subsequent EPI volumes [13]. Image pre-processing and analysis was  
144 carried via in-house UNIX terminal integrating the following tools: Analysis of Functional  
145 NeuroImages (AFNI)[14], FMRIB Software Library (FSL)[15–17] and Advanced Normalization  
146 Tools (ANTs) [18,19]. Anatomical and distortion-corrected functional scan masks outlining  
147 mouse brain boundaries were generated in MATLAB using Three-Dimensional Pulsed Coupled  
148 Neural Networks (PCNN3D) [20] and then manually edited. Then, 3dDespike in AFNI was used  
149 to remove time series spikes and 3dvolreg for image volume alignment. Preprocessed scans were  
150 cropped and a high-pass temporal filter (<0.009Hz) was used (3dTproject) to remove slow

151 variations (temporal drift) in the fMRI signal. Independent component analysis (ICA)  
152 decomposition was then applied using Multivariate Exploratory Optimized Decomposition into  
153 Independent Components (FSL MELODIC version 3.0) to preprocessed scans to assess noise  
154 components in each subjects' native space prior to spatial smoothing and registration. The  
155 resulting components were assessed, and in most cases all components contained noise-related  
156 signal along brain edges, in ventricular voxels, and large vessel regions. These components were  
157 suppressed using a soft ('non-aggressive') regression approach, as implemented in FMRIB  
158 Software Library (FSL 6.0.3) using `fsl_regfilt` [15]. A low-pass filter ( $>0.12\text{Hz}$ ) and spatial  
159 smoothing (0.4mm FWHM) was then applied to the fMRI scans.

160 Preprocessed anatomical and fMRI scans were aligned to a parcellated mouse common  
161 coordinate framework (version 3, or CCFv3) template [21]. Bilateral region of interest (ROI)-  
162 based nodes (64 total) was created with the guidance of the annotated CCFv3 parcellation and  
163 using tools in ITKSNAP and FSL. In ITKSNAP, the template along with the overlaid  
164 parcellation were used to find the left hemisphere voxel coordinates for each of the nodes  
165 included in this study, which were distributed as evenly as possibly without overlap across the  
166 mouse brain template. The node coordinates were positioned in subregions of all areas for  
167 example the optic tract and thalamus. We created 0.6 mm diameter spheric nodes in the template  
168 space (resolution:  $0.05\text{mm}^3$ ) centered on the voxel coordinates. The right hemispheric  
169 representations of the same nodes were then created to complete left and right representations for  
170 each node. For subject-to-atlas registration, fMRI scans are upsampled from a native space  
171  $0.234 \times 0.3125 \times 0.9$  mm resolution (spatially smoothed at 0.4 mm FWHM) to a downsampled  
172 template resolution of  $0.1\text{mm}^3$ . Thus, the spheric nodes, in effect, were designed to sample fMRI  
173 signals at a native space slightly over single-voxel resolution.

174 Anatomical scans were cropped and N4 bias field correction [22] applied to T2 images to  
175 correct intensity variations due to RF field inhomogeneities [23]. The extracted brain maps were  
176 linearly registered to the mouse template using FSL linear registration tool (FLIRT)[15], using a  
177 correlation ratio search cost, full 180-degree search terms, 12 degrees of freedom and trilinear  
178 interpolation. The linear registration output was then nonlinearly warped to the template space  
179 using ANTs (antsIntroduction.sh script). Anatomical-to-atlas linear and nonlinear transformation  
180 matrices were applied to fMRI scans at a later stage. Brain extraction using a mask (see above)  
181 was first applied to fMRI scans and the cropped scans were then aligned to their respective  
182 higher resolution anatomical scans. Timeseries functional images were split into 600 individual  
183 volumes and the first in the series was linearly aligned to the anatomical scan using FLIRT (same  
184 parameters as above, except 6 degrees of freedom was used in this step). ANTs  
185 (antsRegistrationSynQuick.sh script) was used to warp the lower resolution functional images to  
186 their structural (using a single stage step deformable b-spline syn with a 26-step b-spline  
187 distance). Linear and nonlinear warping matrices for fMRI-to-anatomical alignment were applied  
188 to individual scans in the time series, then the merged 4-D functional timeseries were moved to  
189 the atlas space using the prior anatomical-to-template transformation matrices.

190 A total of 64 ROI masks, divided into 32 left and 32 right ROI's, were included in our  
191 analyses. Center voxel coordinates (see above) were used for 3D network visualizations in  
192 BrainNet viewer in MATLAB [24]. Signal timeseries were extracted from preprocessed fMRI  
193 scans with the assistance of ROI mask overlays. This generated 64 individual ROI text files per  
194 subject that contained L2-normalized resting state signals as a vector of 600 data points. The  
195 timeseries files were used in cross-correlations and in calculations of Pearson r coefficients for  
196 every pairwise combinations of ROIs (1dCorrelate in AFNI). The resulting number of pairwise



197 correlations was 1,952 per subject (after removing 64 self-correlations). Correlation coefficients  
198 were imported to MATLAB and Fisher's transform applied to ensure a normal distribution of z  
199 values prior to analyses.

## 200 *2.5 Functional Network Analysis*

201 Functional network analysis was completed as previously reported [25]. Briefly, the  
202 Brain Connectivity Toolbox [26] and MATLAB were used to determine weighted matrices.  
203 Edge densities thresholds were set in a range from 2 to 40% to calculate the following global  
204 network metrics: Clustering Coefficient (tendency of nodes to cluster and connect within the  
205 network), Characteristic Path Length (average of shortest path length between all pairs of nodes  
206 in the network), Transitivity (probability of neighboring nodes to be interconnected within the  
207 network), Global Efficiency (efficiency to communicate across distant brain regions), Louvain  
208 Modularity (density of connections within a neural cluster), and Small World Index (high local  
209 clustering with shortest path length). Unless otherwise indicated in the figures, a 10% threshold  
210 was used for all the node-specific measures such as Node Strength (how strongly a node directly  
211 connects to other nodes), Node degree (number of connections with other nodes), Eigenvector  
212 Centrality (node's influence in a network), Participation Coefficient (node interaction within  
213 single or multiple communities), Local Efficiency (capacity to integrate information between  
214 neighboring nodes), and Betweenness Centrality (node's influences over the flow of information  
215 in the network). Significant alterations in brain connectivity between sham and rmTBI were  
216 determined by using an unpaired T-test.

217

## 218 *2.6 Brain volume and diffusion tensor imaging (DTI): Image Processing and Analysis*

219 Anatomical T2-weighted images of sham and rmTBI mice were used to measure the  
220 brain volume using ITK-SNAP software. Diffusion weighted scans were acquired at 5-7 dpi  
221 using a 4-shot, 2-shell spin echo planar diffusion imaging (DTI EPI) sequence in Bruker  
222 Paravision, with TR = 4 seconds, TE = 19 ms, number of averages = 4, gradient duration  $\delta = 3$   
223 ms, diffusion time  $\Delta = 8$  ms, 54 images with 3 different diffusion weightings, two  $b=0$ , 6  
224 directions with  $b=600$  s/mm<sup>2</sup>, and 46 directions with  $b=2000$  s/mm<sup>2</sup>. A navigator signal was used  
225 by the Bruker reconstruction software to improve signal stability in the 4-shot EPI. Image  
226 saturation bands were placed on either side and below the brain to suppress non-brain signal  
227 during image acquisition. Diffusion images had the same FOV and slice thickness as the  
228 anatomical scan but with a lower resolution data matrix size of 128 x 96 and 17 slices  
229 (resolution: 0.117 mm x 0.117 mm x 0.7 mm) in the same space as anatomical scans. This  
230 allowed careful manual outlining of regions to be analyzed by using T2 scans and diffusion maps  
231 (see below).

232 Diffusion MRI scans were processed using tools available on FMRIB software library -  
233 FSL [27] and DSI Studio [28] as previously reported for mouse diffusion scans obtained at  
234 11.1Tesla [29]. Individual diffusion images were examined carefully and removed from the  
235 image series due to low signal to noise or the presence of motion artifact. The gradient b-vector  
236 files were corrected by removing gradient directions for the removed images. Eddy correction  
237 was used for adjusting slight movements during image acquisition and gradient files rotated  
238 according to the motion correction vectors. After eddy correction, tensor element reconstruction  
239 and estimates of 1<sup>st</sup>, 2<sup>nd</sup> and 3<sup>rd</sup> eigenvectors and eigenvalues ( $\lambda_1$ ,  $\lambda_2$ ,  $\lambda_3$ , where  $\lambda_1$  is axial  
240 diffusivity and the average of  $\lambda_2$  and  $\lambda_3$  provides radial diffusivity values) was performed using

241 weighted least squares regression on DTIFIT in FSL [30]. This last step generated independent  
242 images of FA, mean, axial and radial diffusivities (MD, AD, and RD, respectively).

243 Regions of interest were manually selected in ITK-SNAP to estimate their mean intensity  
244 and volumes. These included thalamus, optic tract, fimbria, corpus callosum, hippocampus, and  
245 amygdala. Significant alterations in brain microstructure were determined by using an unpaired  
246 T-test.

### 247 *2.7 Immunohistochemistry (IHC)*

248 Formalin-fixed, Paraffin-embedded coronal brain sections (5  $\mu$ m) were used for the IHC  
249 study. Both sham and rmTBI slides were processed simultaneously. The slides were  
250 deparaffinized in xylene twice for 5 min each and rehydrated sequentially in the gradient of  
251 ethanol followed by water for 3 min each. The antigen retrieval was performed by immersing  
252 slides in 10mM citrate with 0.5% tween20 (pH 6.0) and 30 min incubation in the steamer. The  
253 endogenous peroxidases were removed by incubating the slides with the mixture of 0.3%  
254 H<sub>2</sub>O<sub>2</sub>/PBS and 10% Triton X-100 (100 $\mu$ l for 200 ml of 0.3% H<sub>2</sub>O<sub>2</sub> solution) for 20 min. Blocking  
255 was performed with 10% normal goat serum/PBS-T (0.05% tween) for 30 min at room  
256 temperature (RT). After blocking, the brain sections were incubated overnight with the following  
257 antibodies: Iba1 (1:1000, PA5-27436, Invitrogen) and GFAP (GA5) (1:1000, CS3670S, Cell  
258 Signaling) at 4°C for microglia and astrocytes, respectively. After incubation, the slides were  
259 washed with PBS-T and incubated for 30 min with corresponding biotinylated secondary  
260 antibody [Goat Anti-Rabbit IgG Antibody (H+L), Biotinylated-(BA-1000); Goat Anti-Mouse  
261 IgG Antibody, Biotinylated, R.T.U. BP-9200, Vector laboratories). Further, the sections were  
262 incubated with avidin-biotin complex (ABC) reagent for 20 min (VECTASTAIN Elite ABC-  
263 HRP Kit, Peroxidase Standard), PK-6100) following washes with PBS-T and developing with 3,

264 3'-diaminobenzidine (DAB) kit [KPL DAB Reagent Set, SeraCare (5510-0031)]. Then, the  
265 slides were washed twice in PBS, 5 min each, and counter-stained with hematoxylin for 1-2 min.  
266 The slides were washed briefly in water and dehydrated with the gradient of alcohol (70%  
267 ethanol, 90% ethanol and 100% ethanol) for 3 min each and incubated in xylene twice for 5 min  
268 each. The sections were mounted with Cytoseal Mountant 60 (Epredia 83104) and air dried. The  
269 slides were scanned using an Aperio image scanner (20X objective lens, Scan Scope™ XT,  
270 Aperio Technologies, Inc. Vista, CA, USA) and quantified using Image Scope software  
271 (v12.4.3.5008) positive pixel count program. Three sections per mouse at 55 µm apart were  
272 averaged to calculate the expression of Iba1 and GFAP.

### 273 *2.8 Spatial proteomics analysis using the NanoString GeoMx Digital Spatial protein profiling* 274 *platform*

275 Formalin-fixed paraffin-embedded brain tissue was sectioned coronal at 5 µm thickness.  
276 DSP staining and assay procedures were conducted according to the manufacturer-directed  
277 protocol. Briefly, to identify regions of interest (ROI), nuclei were fluorescently labeled with  
278 SYTO 13 (GeoMx Nuclear Stain Morphology kit, Item no. 121300303, Nanostring, Seattle,  
279 WA), and microglia cells were labeled with an Iba1 (GeoMx Alzheimer's Morphology Kit, Item  
280 no. 121300306, NanoString, Seattle, WA, United States) antibody. The regions of interest (ROIs)  
281 were selected based on visual identification of anatomic regions using the nuclear stain, aided by  
282 increased Iba1 expression in white matter regions of injured animals. The following ROI were  
283 selected: primary somatic sensory area, dentate gyrus polymorph layer, thalamus, and the optic  
284 tract. The following protein cores and modules were used for multiplexed protein quantification:  
285 Neural Cell Profiling (Item no. 121300120), Parkinson's disease (PD) pathology (Item no.  
286 121300122), Alzheimer's Disease (AD) pathology (Item no. 121300121), AD pathology

287 extended (Item no. 121300123), Glial cell subtyping (Item no. 121300125), and autophagy (Item  
288 no. 121300124) markers. Samples were processed on the NanoString GeoMx system and the  
289 nCounter max system following manufacturer's instructions. Data were analyzed using GeoMx  
290 DSP analysis suit Version 2.4.0.421 as suggested by manufacturer instructions. Briefly, the Field  
291 of view (FOV) QC was adjusted to 45% to check the low count score. All the QC passed  
292 segments were normalized to housekeepers such as GAPDH and Histone H3. Further  
293 background corrections were performed with the negative background targets such as Rb IgG, Rt  
294 IgG2a, and Rt IgG2b. background corrected files were changed to tab-delimited files, and  
295 custom scripts with slight modifications were used to generate volcano plots.

## 296 *2.9 Statistical analyses*

297 GraphPad Prism 9 software was used to perform all the statistical analysis. An unpaired  
298 T-test was used to determine significant differences in nodal properties between control and  
299 injured mice. Multiple t-tests were performed to measure the difference between density  
300 thresholds in rsfMRI data. An unpaired T-test was performed within the GeoMx DSP analysis  
301 suit to analyze the NanoString GeoMx Spatial Profiling data. All the results were represented as  
302 mean  $\pm$  SD;  $p < 0.05$  is considered statistically significant.

## 303 **3. Results**

304 We used the Closed Head Injury Model of Engineered Rotational Acceleration  
305 (CHIMERA) that reproducibly causes DAI [11,31,32]. We injured 2.5-3mo C57Bl/6 mice, twice  
306 within a 24hr interval, and we measured outcomes after the primary injury phase (Fig. 1). As  
307 expected from clinical correlations with T2-weighted images, we found no overt structural or  
308 volumetric changes in the injured mice compared to controls (Fig. 2A-C).

309           Given that changes in brain network organization strongly associate with cognitive  
310 dysfunction [33], we then coupled resting state functional MRI (rsfMRI) and graph theory  
311 network analyses to identify spatial and functional information following TBI [34]. We  
312 performed focal measurements in a rsfMRI modality such as node clustering coefficient, global  
313 and local efficiency, participation coefficient, eigenvector centrality, and betweenness centrality  
314 in specific brain regions that process visual, auditory, somatosensory information, fractional  
315 anisotropy (FA) and axial diffusivity in the optic tract; all in the absence of differences in brain  
316 volume. We developed graphs of functional brain networks by defining nodes (macroscopic  
317 regions of the brain) and edges (links). We selected 64 nodes (Supplementary table 1) that are  
318 closely associated with white matter tracts (Fig. 2D & E) for functional connectivity analysis.  
319 We calculated the node clustering coefficient, which is the index of the number of connected  
320 neighboring nodes [35]. We found that the clustering coefficient in specific thalamic and visual  
321 nodes were the most pronounced and significantly different changes identified (Fig. 2F-2I).

322           We then measured global efficiency and found that the edge density at 4% and 6%  
323 threshold was significantly decreased ( $p=0.024$  and  $p=0.008$ , respectively) in the rmTBI group  
324 (Fig. 3A). Focusing on these densities, we found that local efficiency at the 4% (Fig. 3B-3C) and  
325 6% (Fig. 3D-3F) density thresholds were significantly decreased in specific thalamic and visual  
326 nuclei. No changes were observed in the net clustering coefficient and small world index  
327 between sham and rmTBI groups (Fig. 3G-3H). In contrast, the net characteristic pathlength,  
328 revealing about functional network integration, was significantly increased ( $p=0.0367$ ) in the  
329 rmTBI group at 4% edge density (Fig. 3I), but no changes were observed at the edge density  
330 ranges between 6-40%.

331 The greatest differences following rmTBI were detected in the strength of a node's  
332 connections within its module (participation coefficient) and the influence of distinct nodes on  
333 the network (eigenvector centrality). We found that the participation coefficient in the left ventral  
334 posteromedial thalamic nuclei was significantly decreased ( $p=0.0026$ ) in the rmTBI group (Fig.  
335 4A). Conversely, participation coefficient was significantly increased in the right splenium of  
336 corpus callosum ( $p=0.0028$ ), right central lateral parafascicular thalamic region ( $p=0.0137$ ), right  
337 visual anteromedial area ( $p=0.0373$ ), and right visual postrhinal area ( $p=0.0375$ ) of the rmTBI  
338 group (Fig. 4B-4E). Eigenvector centrality in specific brain regions such as genu of corpus  
339 callosum ( $p=0.0166$ ), the body ( $p=0.0329$ ) and splenium of corpus callosum ( $p=0.0134$ ), and the  
340 thalamic paracentral nucleus ( $p=0.0392$ ) were significantly increased in the rmTBI group  
341 compared to sham (Fig. 4F-4I). The node betweenness centrality in the thalamic dorsal lateral  
342 geniculate nucleus was significantly increased in the rmTBI group (Fig. 4J). These highly unique  
343 characteristics reveal alterations to unique brain regions that define rmTBI node specificity.  
344 Meanwhile, other network features such as global network strength, Louvain modularity,  
345 assortativity, and Gamma values showed modest or undetectable differences between the sham  
346 and rmTBI groups. Only, the net lambda values, which indicate the degree of network  
347 randomness within neighboring nodes, was significantly decreased at wide edge densities from  
348 8% to 40% ( $p<0.05$ ) in rmTBI group (Fig. S1).

349 Given FC differences in specific nodes, we examined cerebral microstructure by  
350 measuring the diffusion of water molecules in the thalamus, optic tract, and corpus callosum. We  
351 also focused on the fimbria, hippocampus, and amygdala because of their important role in  
352 learning and memory (Fig. 5A). We observed that the fractional anisotropy (FA), which  
353 measures white matter integrity, was significantly decreased ( $p=0.0240$ ) in the optic tract of the

354 rmTBI mice (Fig. 5B). The mean diffusivity (MD) ( $p=0.0259$ ) in the hippocampus was  
355 significantly increased after rmTBI. A higher diffusion rate (increased water content) suggests  
356 the presence of edema or inflammation in this region (Fig. 5C). Two other measures of axonal  
357 integrity, radial diffusivity (RD;  $p=0.0303$ ) and axial diffusivity (L1;  $p=0.0413$ ) were also  
358 increased in the hippocampus of the rmTBI group, suggesting greater diffusion rate running  
359 parallel and perpendicular to white matter fiber tracts (Fig. 5D & 5E). As expected, due to the  
360 limited white matter content, we did not detect volumetric changes in the thalamus, fimbria, and  
361 amygdala between the sham and rmTBI groups.

362 We measured white matter gliosis by measuring localized changes in the levels of Iba1  
363 and GFAP using immunohistochemistry. We detected a robust glial response in the optic tract  
364 (Fig. 6A-B and 6D-E) and corpus callosum (Fig. 6G-H) of injured mice. As established in  
365 previous reports, Iba1-positive microglia were significantly increased ( $p<0.0001$ ) in the optic  
366 tract of injured mice (Fig. 6C). Similarly, GFAP-positive signal was significantly increased in  
367 both the optic tract ( $p<0.0001$ ; Fig 6F) and corpus callosum ( $p<0.0320$ ; Fig. 6I) of the rmTBI.

368 The rsfMRI and DTI data identified four brain regions that were significantly altered by  
369 the injuries: the primary somatosensory area, hippocampus, thalamus, and optic tract. To  
370 determine whether the injuries impacted the levels of specific proteins in these areas, we  
371 performed digital spatial protein profiling using the NanoString GeoMx DSP platform. We  
372 measured changes in the levels of 72 proteins altered in ADRDs in the following ROI's primary  
373 somatosensory area, dentate gyrus polymorph area, thalamus, and optic tract.

374 Levels of distinct proteins were significantly increased or decreased in the three areas of  
375 interest (Fig. 7A-B and Table 1). We observed no changes in the dentate gyrus polymorph layer  
376 (Data not shown). Myelin basic protein was significantly downregulated in the primary



377 somatosensory area, which reflects white matter damage (Fig. 7N&O). Interestingly, both total  
378 tau and phospho-tau S396 (pS396) levels were significantly decreased but levels of one phospho-  
379 tau species, pS199 tau, were increased in the rmTBI group (Fig. 7C-7F). Various  
380 neuroinflammatory markers such as Iba1, GFAP, Cathepsin-D (Fig. 7H-7J) were significantly  
381 increased in the optic tract of the rmTBI group. The expression of neuroinflammatory marker  
382 GPNMB was also significantly increased, and cell proliferation marker Ki-67 was significantly  
383 decreased in the thalamic region (Fig. 7K-7M).

384         These data align with both expected and previously reported alterations to molecular  
385 processes following head injury, including neuroinflammation (e.g. Iba1), white matter damage  
386 (e.g. MBP), and microtubule disruption (e.g. tau). Unexpectedly, changes in the levels of these  
387 proteins were unique to specific brain regions, suggesting that the injury-induced alterations  
388 unleash distinct consequences. Importantly, these distinct changes could be the root of the  
389 imaging alterations identified in the rsfMRI, and they may serve as biomarkers that distinguish  
390 clinical outcomes.

#### 391 **4. Discussion**

392         The long-term goal of this study was to establish novel mechanistic information that  
393 connects head injuries to neurodegenerative disorders. Here, we identified rmTBI-induced  
394 imaging abnormalities and aberrant accumulation of unique proteins. We determined that injuries  
395 impact brain regions in distinct manners, and these distinctions may explain why rmTBI  
396 manifests differently between subjects. We also identified proteins that are increased or  
397 decreased depending on the brain region (Table 1). Our data strongly suggest that the molecular  
398 pathways leading to accumulation or depletion of these proteins contributes to the imaging  
399 abnormalities we identified.

400 Investigating brain networks using rsfMRI and graph theory offers powerful functional  
401 measures, all of which can be translated to the clinic. Network alterations, such as the ones  
402 described herein, have strong diagnostic potential for TBI among other brain disorders [36–38].  
403 Recent work using rsfMRI identified broad functional connectivity deficits in human subjects;  
404 these defects correlated with diminished choice-reaction scores, showing high sensitivity. Our  
405 work improves upon pre-clinical and clinical studies because we dissected more granular aspects  
406 of functional connectivity in a mouse model of rmTBI and at ultra-high field [25,39–41].  
407 Functional graph metrics such as clustering coefficient, characteristic path length, centrality, and  
408 efficiency are quantifiable features that reveal how information flows throughout the network  
409 [42], and they were impaired following rmTBI (Fig. 2-4). Our findings are concordant with other  
410 pre-clinical models of mild head injury showing local alterations in betweenness centrality,  
411 clustering coefficient, and local efficiency, while global changes were intact [43], showing that  
412 these robust measures could be applicable to milder and [44,45] repetitive TBI.

413 Although we did not detect global changes (as reported in Boroda et al., 2021[46]) in  
414 clustering coefficient, the local clustering coefficient at 10% edge density was significantly  
415 reduced in the visual anteromedial area and various sub-regions of the thalamus in the rmTBI  
416 group. Further, we observed a significant decrease in net global and local efficiency in the  
417 rmTBI group at thresholds below 10% densities which contain true connections; this measure is  
418 commonly used in clinical practice [44,45]. These results positively reveal that local integration,  
419 efficiency, and integrative information processing across distal brain regions were significantly  
420 altered following rmTBI. Consistent with previous reports, we did not observe changes in the  
421 small-world index and net clustering coefficient after mTBI [25].

422 We also calculated eigenvector and betweenness centrality to assess the highly influential  
423 nodes and nodes at the intersection between the shortest path, respectively [25]. We observed  
424 high betweenness centrality scores in thalamus dorsal lateral geniculate and high eigenvector  
425 centrality scores in modules with nodes located in sub-regions of corpus callosum and thalamus.  
426 Our results indicate that the injury increased the distance between connections of the thalamus  
427 and corpus callosum thereby impacting the connectivity between clusters in these networks. We  
428 note that these nodal changes are not observed in all TBI models. Yang et al., 2021[25] reported  
429 no differences in betweenness centrality in Controlled cortical impact (CCI) rats at 30 dpi. Given  
430 that nodes in eigenvector centrality scores in the contralateral cortex can be restored from 2 to 30  
431 days after injury, it will be important to assess these metrics at later post-injury periods to  
432 confirm the long-term repercussions of rmTBI. Confirming these changes at different timepoints  
433 will provide valuable information about compensatory mechanisms and reorganization of  
434 damaged networks after TBI.

435 The thalamus is an important deep gray matter region of the brain composed a bundle of  
436 white matter tracts and groups of nuclei, which plays a vital role in global multifunctional  
437 pathways. It is highly susceptible to damage due to sudden acceleration or deceleration  
438 movements during head trauma [38]. Consistent with previous reports, our results show that  
439 rmTBI induced by CHIMERA damages thalamic nuclei. Given its numerous roles in integrating  
440 brain signaling, damage to the thalamus may result in varied manifestations after TBI; this may  
441 underlie why patients present broad symptomatology.

442 In addition to the network-associated changes, aberrant signaling at the molecular level is  
443 a probable pathogenic factor in the transition from rmTBI to chronic neurodegeneration. We  
444 observed significant changes in distinct proteins that aligned with unique brain regions. For

445 example, significant accumulation of Iba1 and GFAP in the optic tract, which was consistent  
446 with the immunohistochemistry results and previous studies using CHIMERA [11], indicate that  
447 rmTBI induced gliosis. In addition, glycoprotein non-metastatic melanoma protein B (GPNMB)  
448 was significantly increased in the thalamus of the rmTBI group. GPNMB is highly expressed in  
449 glia, and is linked with risk for Parkinson's disease [47,48].

450         Given their limited and unclear molecular links with TBI, follow-up experiments  
451 evaluating the prognostic value of GPNMB, Ki67, and cathepsin-D after rmTBI could unveil  
452 new biomarkers. Interestingly, total and pS396 tau levels were decreased in the optic tract were  
453 decreased, while pS199 tau was increased. We hypothesize that this could be the result of tau  
454 cleavage resulting from head injury; importantly, it suggests that distinct post-translationally  
455 modified tau species could extravasate and reflect the state of injuries thereby serving as more  
456 reliable biomarkers [7]

457         The outcomes of the present study provide important information about the effect of  
458 rmTBI and its primary molecular mechanism on the underlying pathology at 5-7dpi; this period  
459 corresponds to secondary injury, where complex molecular pathways are unleashed after injury.  
460 Importantly, changes in this time point could precede the long-term consequences of rmTBI and  
461 connect injuries with the pathophysiology of TBI-associated neurodegenerative diseases. Our  
462 future work on the assessment of the post-TBI effect together with behavioral outcomes will help  
463 to understand the molecular mechanisms of TBI and their long-term consequences on cognition.

## 464 **5. Conclusions**

465         Using highly translational imaging modalities and digital spatial protein profiling we  
466 report abnormalities following CHIMERA-induced rmTBI 5-7dpi. These measures may serve as  
467 potential biomarkers that can diagnose rmTBI and predict clinical outcomes. Moreover, protein

468 changes could be responsible for the molecular pathways involved in the acute and chronic  
469 consequences of rmTBI. Studies to identify the longevity of these abnormalities and their  
470 association with cognitive dysfunction are currently underway.

471 **Acknowledgements**

472           This work was primarily supported by grant 1 R01 AG074584-01 from NIH/NIA. A  
473 portion of this work was performed in the McKnight Brain Institute at the National High  
474 Magnetic Field Laboratory's Advanced Magnetic Resonance Imaging and Spectroscopy  
475 (AMRIS) Facility, which is supported by National Science Foundation Cooperative Agreement  
476 DMR-1644779 and the State of Florida. This work was supported in part by an NIH award, S10  
477 RR025671, for MRI/S instrumentation.

478

479 **Conflict of interest:**

480 The authors declare no conflict of interest.

481 **References:**

- 482 1. Cassidy JD, Carroll LJ, Peloso PM, Borg J, von Holst H, Holm L, et al. Incidence, risk factors  
483 and prevention of mild traumatic brain injury: Results of the WHO Collaborating Centre Task  
484 Force on Mild Traumatic Brain Injury. *J Rehabil Med Suppl.* 2004;28–60.
- 485 2. Schwab K, Terrio HP, Brenner LA, Pazdan RM, McMillan HP, MacDonald M, et al.  
486 Epidemiology and prognosis of mild traumatic brain injury in returning soldiers. *Neurology.*  
487 2017;88:1571–9.
- 488 3. Nolan A, Hennessy E, Krukowski K, Guglielmetti C, Chaumeil MM, Sohal VS, et al.  
489 Repeated Mild Head Injury Leads to Wide-Ranging Deficits in Higher-Order Cognitive  
490 Functions Associated with the Prefrontal Cortex. *J Neurotrauma.* 2018;35:2425–34.
- 491 4. Pavlov V, Thompson-Leduc P, Zimmer L, Wen J, Shea J, Beyhaghi H, et al. Mild traumatic  
492 brain injury in the United States: demographics, brain imaging procedures, health-care utilization  
493 and costs. *Brain Inj. Taylor & Francis;* 2019;33:1151–7.
- 494 5. McKee AC, Cantu RC, Nowinski CJ, Hedley-Whyte ET, Gavett BE, Budson AE, et al.  
495 Chronic traumatic encephalopathy in athletes: Progressive tauopathy after repetitive head injury.  
496 *J Neuropathol Exp Neurol.* 2009;68:709–35.
- 497 6. Giunta B, Obregon D, Velisetty R, Sanberg PR, Borlongan C V., Tan J. The immunology of  
498 traumatic brain injury: a prime target for Alzheimer’s disease prevention. *J Neuroinflammation.*  
499 ???; 2012;9:1.
- 500 7. Abisambra JF, Scheff S. Brain Injury in the Context of Tauopathies. *J Alzheimer’s Dis.*  
501 2014;40:495–518.
- 502 8. Jassam YN, Izzy S, Whalen M, McGavern DB, El Khoury J. Neuroimmunology of Traumatic  
503 Brain Injury: Time for a Paradigm Shift. *Neuron. Elsevier Inc.;* 2017;95:1246–65.

- 504 9. Walker A, Chapin B, Abisambra J, DeKosky ST. Association between single moderate to  
505 severe traumatic brain injury and long-term tauopathy in humans and preclinical animal models:  
506 a systematic narrative review of the literature. *Acta Neuropathol Commun. BioMed Central*;  
507 2022;10:1–20.
- 508 10. Arfanakis K, Haughton VM, Carew JD, Rogers BP, Dempsey RJ, Meyerand ME. Diffusion  
509 tensor MR imaging in diffuse axonal injury. *AJNR Am J Neuroradiol.* 2002;23:794–802.
- 510 11. Namjoshi DR, Cheng WH, McInnes KA, Martens KM, Carr M, Wilkinson A, et al. Merging  
511 pathology with biomechanics using CHIMERA (Closed-Head Impact Model of Engineered  
512 Rotational Acceleration): a novel, surgery-free model of traumatic brain injury. *Mol*  
513 *Neurodegener.* 2014;9:55.
- 514 12. Pompilus M, Colon-Perez LM, Grudny MM, Febo M. Contextual experience modifies  
515 functional connectome indices of topological strength and efficiency. *Sci Rep. Nature Publishing*  
516 *Group UK;* 2020;10:1–15.
- 517 13. Andersson JLR, Skare S, Ashburner J. How to correct susceptibility distortions in spin-echo  
518 echo-planar images: application to diffusion tensor imaging. *Neuroimage.* 2003;20:870–88.
- 519 14. Cox RW. AFNI: Software for Analysis and Visualization of Functional Magnetic Resonance  
520 Neuroimages. *Comput Biomed Res.* 1996;29:162–73.
- 521 15. Jenkinson M, Bannister P, Brady M, Smith S. Improved Optimization for the Robust and  
522 Accurate Linear Registration and Motion Correction of Brain Images. *Neuroimage.*  
523 2002;17:825–41.
- 524 16. Smith SM. Fast robust automated brain extraction. *Hum Brain Mapp.* 2002;17:143–55.
- 525 17. Smith SM, Jenkinson M, Johansen-Berg H, Rueckert D, Nichols TE, Mackay CE, et al.  
526 Tract-based spatial statistics: Voxelwise analysis of multi-subject diffusion data. *Neuroimage.*



- 527 2006;31:1487–505.
- 528 18. Avants BB, Tustison NJ, Song G, Cook PA, Klein A, Gee JC. A reproducible evaluation of  
529 ANTs similarity metric performance in brain image registration. *Neuroimage*. 2011;54:2033–44.
- 530 19. Grandjean J, Zerbi V, Balsters JH, Wenderoth N, Rudin M. Structural Basis of Large-Scale  
531 Functional Connectivity in the Mouse. *J Neurosci*. 2017;37:8092–101.
- 532 20. Chou N, Jiarong Wu, Bai Bingren J, Anqi Qiu, Kai-Hsiang Chuang. Robust Automatic  
533 Rodent Brain Extraction Using 3-D Pulse-Coupled Neural Networks (PCNN). *IEEE Trans Image*  
534 *Process*. 2011;20:2554–64.
- 535 21. Lein ES, Hawrylycz MJ, Ao N, Ayres M, Bensinger A, Bernard A, et al. Genome-wide atlas  
536 of gene expression in the adult mouse brain. *Nature*. 2007;445:168–76.
- 537 22. Tustison NJ, Avants BB, Cook PA, Yuanjie Zheng, Egan A, Yushkevich PA, et al. N4ITK:  
538 Improved N3 Bias Correction. *IEEE Trans Med Imaging*. 2010;29:1310–20.
- 539 23. Kenkel WM, Yee JR, Moore K, Madularu D, Kulkarni P, Gamber K, et al. Functional  
540 magnetic resonance imaging in awake transgenic fragile X rats: evidence of dysregulation in  
541 reward processing in the mesolimbic/habenular neural circuit. *Transl Psychiatry*. 2016;6:e763–  
542 e763.
- 543 24. Xia M, Wang J, He Y. BrainNet Viewer: A Network Visualization Tool for Human Brain  
544 Connectomics. Csermely P, editor. *PLoS One*. 2013;8:e68910.
- 545 25. Yang Z, Zhu T, Pompilus M, Fu Y, Zhu J, Arjona K, et al. Compensatory functional  
546 connectome changes in a rat model of traumatic brain injury. *Brain Commun*. 2021;3:1–17.
- 547 26. Rubinov M, Sporns O. Complex network measures of brain connectivity: Uses and  
548 interpretations. *Neuroimage*. Elsevier Inc.; 2010;52:1059–69.
- 549 27. Smith SM, Jenkinson M, Woolrich MW, Beckmann CF, Behrens TEJ, Johansen-Berg H, et

- 550 al. Advances in functional and structural MR image analysis and implementation as FSL.  
551 Neuroimage. 2004;23:S208–19.
- 552 28. Yeh F-C, Verstynen TD, Wang Y, Fernández-Miranda JC, Tseng W-YI. Deterministic  
553 Diffusion Fiber Tracking Improved by Quantitative Anisotropy. Zhan W, editor. PLoS One.  
554 2013;8:e80713.
- 555 29. Colon-Perez LM, Ibanez KR, Suarez M, Torroella K, Acuna K, Ofori E, et al. Neurite  
556 orientation dispersion and density imaging reveals white matter and hippocampal microstructure  
557 changes produced by Interleukin-6 in the TgCRND8 mouse model of amyloidosis. Neuroimage.  
558 2019;202:116138.
- 559 30. Behrens TEJ, Woolrich MW, Jenkinson M, Johansen-Berg H, Nunes RG, Clare S, et al.  
560 Characterization and propagation of uncertainty in diffusion-weighted MR imaging. Magn Reson  
561 Med. 2003;50:1077–88.
- 562 31. McNamara EH, Grillakis AA, Tucker LB, McCabe JT. The closed-head impact model of  
563 engineered rotational acceleration (CHIMERA) as an application for traumatic brain injury pre-  
564 clinical research: A status report. Exp Neurol. Elsevier; 2020;333:113409.
- 565 32. Cheng WH, Martens KM, Bashir A, Cheung H, Stukas S, Gibbs E, et al. CHIMERA  
566 repetitive mild traumatic brain injury induces chronic behavioural and neuropathological  
567 phenotypes in wild-type and APP/PS1 mice. Alzheimers Res Ther. 2019;11:6.
- 568 33. Pandit AS, Expert P, Lambiotte R, Bonnelle V, Leech R, Turkheimer FE, et al. Traumatic  
569 brain injury impairs small-world topology. Neurology. 2013;80:1826–33.
- 570 34. Ham TE, Sharp DJ. How can investigation of network function inform rehabilitation after  
571 traumatic brain injury? Curr Opin Neurol. 2012;25:662–9.
- 572 35. Yang Z, Zhu T, Pompilus M, Fu Y, Zhu J, Arjona K, et al. Compensatory functional

- 573 connectome changes in a rat model of traumatic brain injury. *Brain Commun.* 2021;3:1–17.
- 574 36. Khazae A, Ebrahimzadeh A, Babajani-Feremi A. Identifying patients with Alzheimer’s  
575 disease using resting-state fMRI and graph theory. *Clin Neurophysiol. International Federation*  
576 *of Clinical Neurophysiology*; 2015;126:2132–41.
- 577 37. Liu J, Li M, Pan Y, Lan W, Zheng R, Wu FX, et al. Complex Brain Network Analysis and Its  
578 Applications to Brain Disorders: A Survey. *Complexity.* 2017;2017.
- 579 38. Tang L, Ge Y, Sodickson DK, Miles L, Zhou Y, Reaume J, et al. Thalamic resting-state  
580 functional networks: Disruption in patients with mild traumatic brain injury. *Radiology.*  
581 2011;260:831–40.
- 582 39. Sharp DJ, Beckmann CF, Greenwood R, Kinnunen KM, Bonnelle V, De Boissezon X, et al.  
583 Default mode network functional and structural connectivity after traumatic brain injury. *Brain.*  
584 2011;134:2233–47.
- 585 40. Hillary FG, Slocomb J, Hills EC, Fitzpatrick NM, Medaglia JD, Wang J, et al. Changes in  
586 resting connectivity during recovery from severe traumatic brain injury. *Int J Psychophysiol.*  
587 Elsevier B.V.; 2011;82:115–23.
- 588 41. Li F, Liu Y, Lu L, Shang S, Chen H, Haidari NA, et al. Rich-club reorganization of  
589 functional brain networks in acute mild traumatic brain injury with cognitive impairment. *Quant*  
590 *Imaging Med Surg.* 2022;12:3932–46.
- 591 42. Ajilore O, Lamar M, Leow A, Zhang A, Yang S, Kumar A, et al. Depression. *Am J Geriatr*  
592 *Psychiatry.* 2015;22:195–206.
- 593 43. Kim E, Seo HG, Seong MY, Kang MG, Kim H, Lee MY, et al. An exploratory study on  
594 functional connectivity after mild traumatic brain injury: Preserved global but altered local  
595 organization. *Brain Behav.* 2022;1–13.

- 596 44. Hagmann P, Cammoun L, Gigandet X, Meuli R, Honey CJ, Wedeen VJ, et al. Mapping the  
597 Structural Core of Human Cerebral Cortex. Friston KJ, editor. PLoS Biol. 2008;6:e159.
- 598 45. Perry A, Wen W, Lord A, Thalamuthu A, Roberts G, Mitchell PB, et al. The organisation of  
599 the elderly connectome. Neuroimage. 2015;114:414–26.
- 600 46. Boroda E, Armstrong M, Gilmore CS, Gentz C, Fenske A, Fiecas M, et al. Network topology  
601 changes in chronic mild traumatic brain injury (mTBI). NeuroImage Clin. Elsevier Inc.;  
602 2021;31:102691.
- 603 47. Murthy MN, Blauwendraat C, Guelfi S, Hardy J, Lewis PA, Trabzuni D. Increased brain  
604 expression of GPNMB is associated with genome wide significant risk for Parkinson’s disease  
605 on chromosome 7p15.3. Neurogenetics. neurogenetics; 2017;18:121–33.
- 606 48. Kia DA, Zhang D, Guelfi S, Manzoni C, Hubbard L, Reynolds RH, et al. Identification of  
607 Candidate Parkinson Disease Genes by Integrating Genome-Wide Association Study,  
608 Expression, and Epigenetic Data Sets. JAMA Neurol. 2021;78:464–72.

609 **Figure legends:**

610 **Fig. 1.** CHIMERA validation. The schematic representation and experimental design showing  
611 the number of rmTBIs, rsfMRI and tissue collection. Brains were collected at 7 dpi for  
612 Immunohistochemistry (IHC) and NanoString GeoMx spatial protein profiling analyses.

613 **Fig. 2. Clustering coefficient analysis reveals that the network integration and efficiency in**  
614 **specific brain regions are disrupted following rmTBI.** Representative T2 weighted anatomical  
615 brain images of sham and rmTBI mice (**A&B**) were used for brain volume analysis.  
616 Quantification of brain volume revealed no changes between sham and rmTBI groups (**C**). 3D  
617 functional connectome maps of sham and rmTBI mice brain shows the position of nodes and  
618 edges in the region of interest (ROIs) [total ROI = 64] (**D&E**). Clustering coefficient in various

619 regions of thalamus and visual area (**F-I**) were significantly altered in rmTBI group compared to  
620 sham. Unpaired t-test, mean  $\pm$  SD, Sham (N= 8), rmTBI (N=10).

621 **Fig. 3. Global and Local efficiency analysis reveals that efficiency in specific brain regions**  
622 **are disrupted following rmTBI.** Global efficiency (**A**) was significantly decreased at the  
623 density threshold of 4% and 6% in rmTBI group compared to Sham. Local efficiency at 4%  
624 threshold (**B & C**) was significantly decreased in thalamus anterior pretectal nucleus (L-Left)  
625 and thalamus mediodorsal (R-Right) regions of Injured mice. Similarly, Local efficiency at 6%  
626 threshold (**D-F**) was significantly decreased in thalamus anterior pretectal nucleus (L), thalamus  
627 dorsal lateral geniculate (L) and visual anterior area (R) of injured mice compared to Sham. No  
628 changes in global clustering coefficient (**G**) and small world index (**H**) were observed. The  
629 global characteristic pathlength (**I**) at 4% threshold was significantly increased in injured mice  
630 group compared to sham. The global metrics were analyzed by Multiple Unpaired t-test, mean  $\pm$   
631 standard error at edge densities ranges 2 to 40%. The groups comparison was analyzed by  
632 Unpaired t-test, mean  $\pm$  SD, Sham (N= 8), rmTBI (N=10).

633 **Fig. 4. rmTBI disrupted connectivity between modules, increased eigenvector centrality**  
634 **and node betweenness centrality.** Nodes in left (L) thalamus ventral posteromedial (**A**) region  
635 had low participation coefficient, but it is significantly increased in the right (R) splenium of  
636 corpus callosum, thalamus (R) and visual regions (R) of rmTBI group relative to control (**B-E**).  
637 Increased eigenvector centrality shows increased high influence of specific nodes on connected  
638 networks following rmTBI in thalamic regions and corpus callosum (**F-I**). The node  
639 betweenness centrality shows the nodes at the intersection between shortest path in the specific  
640 thalamus region (**J**) was significantly altered. Density threshold at which the participation  
641 coefficient and node eigenvector centrality were calculated. Unpaired t-test, mean  $\pm$  SD.

642 **Fig. 5. rmTBI altered tissue microstructure in specific brain regions.** Representative DTI  
643 brain image shows (A) ROIs selected for microstructure pattern analysis. rmTBI increased  
644 fractional anisotropy (FA) in the optic tract (B). Mean diffusivity (MD) and radial diffusivity  
645 (RD) were significantly increased in hippocampus of the injured mice (C&D). Axial diffusivity  
646 (L1) was significantly increased in the optic tract and hippocampus of the injured mice (E)  
647 compared to sham. Unpaired t-test, mean  $\pm$  SD.

648 **Fig. 6. rmTBI induced gliosis in white matter tracts.** Iba1 expression was significantly  
649 increased in the optic tract of injured mice compared to sham (A-C). The red arrowhead  
650 indicates microglia. Brain coronal view: 1 mm; Scale bar for inset (enlarged view of the optic  
651 tract) = 100  $\mu$ m. \*\*\*\* $p$ <0.0001, Unpaired t-test; Sham (N= 15), rmTBI (N=20). GFAP  
652 expression was significantly increased in the optic tract (D-F) and corpus callosum (G-I) of  
653 injured mice compared to sham. The blue arrowhead indicates astrocytes. Brain coronal view: 1  
654 mm; Scale bar for inset (enlarged view of the optic tract and corpus callosum) = 100  $\mu$ m.  
655 (\*\*\*\* $p$ <0.0001; \* $p$ = 0.0320, Unpaired t-test), Sham (N= 15), rmTBI (N=19).

656 **Fig. 7. rmTBI increased the expression of disease associated proteins in white matter and**  
657 **grey matter regions.** Coronal sections of sham and rmTBI mice shows the region of interest  
658 (primary somatic sensory area, dentate gyrus polymorph layer, thalamus, and the optic tract)  
659 selected for NanoString GeoMx spatial protein profiling analysis (A&B). Volcano plots (C) and  
660 bar graphs (D-J) show significant alteration in the expression of Alzheimer's disease (AD)  
661 pathological markers, glial and neural cell markers in the optic tract of the injured mice. Volcano  
662 plot (K) and bar graphs show (L&M) significant changes in the expression of cell proliferation  
663 and AD associated, neuroinflammatory markers in the thalamus of the injured mice. Myelin  
664 basic protein was significant decreased in the primary somatosensory area following rmTBI

665 (N&O). Protein levels were normalized to the expression of housekeeping proteins. Unpaired t-  
666 test, mean  $\pm$  SD, N=4-8.

667 **Supplementary information Legend:**

668 **Fig. S1. Network disruption by rmTBI is not widespread.** No differences in the Network  
669 strength (A), Louvain modularity (B), Assortativity (C), Transitivity (D) and Gamma (E). Net  
670 lambda was significantly decreased in rmTBI group at various density threshold levels compared  
671 to sham (F). Multiple unpaired t-test, mean error  $\pm$  SD at edge densities ranges 2 to 40%.

672 **Table Legend:**

673 **Table. 1.** Summary of the expression of various neuropathological markers following rmTBI  
674 identified through NanoString GeoMx spatial protein profiling analysis.

675 **Supplementary table Legend:**

676 **Supplementary table. 1.** The complete list of 64 ROIs (left and right) analyzed through rsfMRI  
677 and graph theory.

678

679

680

681

682

683

684

685

686

687

688 **Table. 1**

| <b>ROIs</b>                       | <b>Protein Biomarker</b> | <b>Expression</b> | <b>Full target name</b>             | <b>Cell profiling panel</b> | <b>p-value</b> |
|-----------------------------------|--------------------------|-------------------|-------------------------------------|-----------------------------|----------------|
| <b>Primary somatosensory area</b> | Myelin basic protein     | Down              | Myelin basic protein                | Neural Cell Profiling Core  | 0.0059         |
| <b>Thalamus</b>                   | GPNMB                    | Up                | glycoprotein NMB                    | Glial cell subtyping module | 0.0157         |
|                                   | Ki-67                    | Down              | marker of proliferation Ki-67       | Neural Cell Profiling Core  | 0.0466         |
| <b>Optic tract</b>                | CTSD                     | Up                | cathepsin D                         | Glial cell subtyping module | 0.0014         |
|                                   | Iba1                     | Up                | allograft inflammatory factor 1     | Neural Cell Profiling Core  | 0.0024         |
|                                   | pTau(S199)               | Up                | microtubule-associated protein tau  | AD pathology extended       | 0.0067         |
|                                   | GFAP                     | Up                | glial fibrillary acidic protein     | Neural Cell Profiling Core  | 0.0110         |
|                                   | Tau                      | Down              | microtubule-associated protein tau  | AD pathology module         | 0.0092         |
|                                   | MERTK                    | Down              | MER proto-oncogene, tyrosine kinase | Glial cell subtyping module | 0.0273         |
|                                   | pTau(S396)               | Down              | microtubule-associated protein tau  | AD pathology extended       | 0.0491         |

689

690

691

692

693

694

695



696 **Supplementary table. 1**

| <b>ROI #</b> | <b>Abbreviation</b> | <b>Region</b>                                      |
|--------------|---------------------|----------------------------------------------------|
| 1            | L VISAA             | Visual Anterior area                               |
| 2            | L VISRLA            | Visual Rostrolateral area                          |
| 3            | L VISAMA            | Visual Anteromedial area                           |
| 4            | L VISLA             | Visual Lateral area                                |
| 5            | L VISPV1            | Visual primary visual                              |
| 6            | L VISPV2            | Visual primary visual                              |
| 7            | L VISPL             | Visual Posterolateral                              |
| 8            | L VISPM             | Visual Posteromedial                               |
| 9            | L VISPR             | Visual postrhinal                                  |
| 10           | L THA MED           | Thalamus mediodorsal                               |
| 11           | L THA L             | Thalamus anterolateral complex of ventral thalamus |
| 12           | L THA AC            | Thalamus laterodorsal                              |
| 13           | L THA PC            | Thalamus posterior complex                         |
| 14           | L THA VP            | Thalamus ventral posteromedial                     |
| 15           | L THA para          | Thalamus paracentral nucleus                       |
| 16           | L THA PL            | Thalamus posterior lateral                         |
| 17           | L THA CL            | Thalamus central lateral – parafascicular          |
| 18           | L THA AP            | Thalamus anterior pretectal nucleus                |
| 19           | L THA DL            | Thalamus dorsal lateral geniculate                 |
| 20           | L THA V             | Thalamus ventromedial                              |
| 21           | L TEMP              | Temporal association areas                         |
| 22           | L DEN               | dentate nuclei of cerebellum                       |
| 23           | L CERE              | interposed complex of cerebellum                   |
| 24           | L CP G              | genu of corpus callosum                            |
| 25           | L CP1               | Body of corpus callosum 1                          |
| 26           | L CP2               | Body of corpus callosum 2                          |
| 27           | L SCP1              | splenium of corpus callosum 1                      |
| 28           | L SCP2              | splenium of corpus callosum 2                      |
| 29           | L SCP3              | splenium of corpus callosum 3                      |
| 30           | L OT1               | Optic tract 1                                      |
| 31           | L OT2               | Optic tract 2                                      |
| 32           | L OT3               | Optic tract 3                                      |
| 33           | R VISAA             | Visual Anterior area                               |
| 34           | R VISRLA            | Visual Rostrolateral area                          |
| 35           | R VISAMA            | Visual Anteromedial area                           |
| 36           | R VISLA             | Visual Lateral area                                |

|    |            |                                                    |
|----|------------|----------------------------------------------------|
| 37 | R VISPV1   | Visual primary visual                              |
| 38 | R VISPV2   | Visual primary visual                              |
| 39 | R VISPL    | Visual Posterolateral                              |
| 40 | R VISPM    | Visual Posteromedial                               |
| 41 | R VISPR    | Visual postrhinal                                  |
| 42 | R THA MED  | Thalamus mediodorsal                               |
| 43 | R THA L    | Thalamus anterolateral complex of ventral thalamus |
| 44 | R THA AC   | Thalamus laterodorsal                              |
| 45 | R THA PC   | Thalamus posterior complex                         |
| 46 | R THA VP   | Thalamus ventral posteromedial                     |
| 47 | R THA para | Thalamus paracentral nucleus                       |
| 48 | R THA PL   | Thalamus posterior lateral                         |
| 49 | R THA CL   | Thalamus central lateral – parafascicular          |
| 50 | R THA AP   | Thalamus anterior pretectal nucleus                |
| 51 | R THA DL   | Thalamus dorsal lateral geniculate                 |
| 52 | R THA V    | Thalamus ventromedial                              |
| 53 | R TEMP     | Temporal association areas                         |
| 54 | R DEN      | dentate nuclei of cerebellum                       |
| 55 | R CERE     | interposed complex of cerebellum                   |
| 56 | R CP G     | genu of corpus callosum                            |
| 57 | R CP1      | Body of corpus callosum 1                          |
| 58 | R CP2      | Body of corpus callosum 2                          |
| 59 | R SCP1     | splenium of corpus callosum 1                      |
| 60 | R SCP2     | splenium of corpus callosum 2                      |
| 61 | R SCP3     | splenium of corpus callosum 3                      |
| 62 | R OT1      | Optic tract 1                                      |
| 63 | R OT2      | Optic tract 2                                      |
| 64 | R OT3      | Optic tract 3                                      |

697

698

699

700

701

702

703

704

705

706

707

708

709

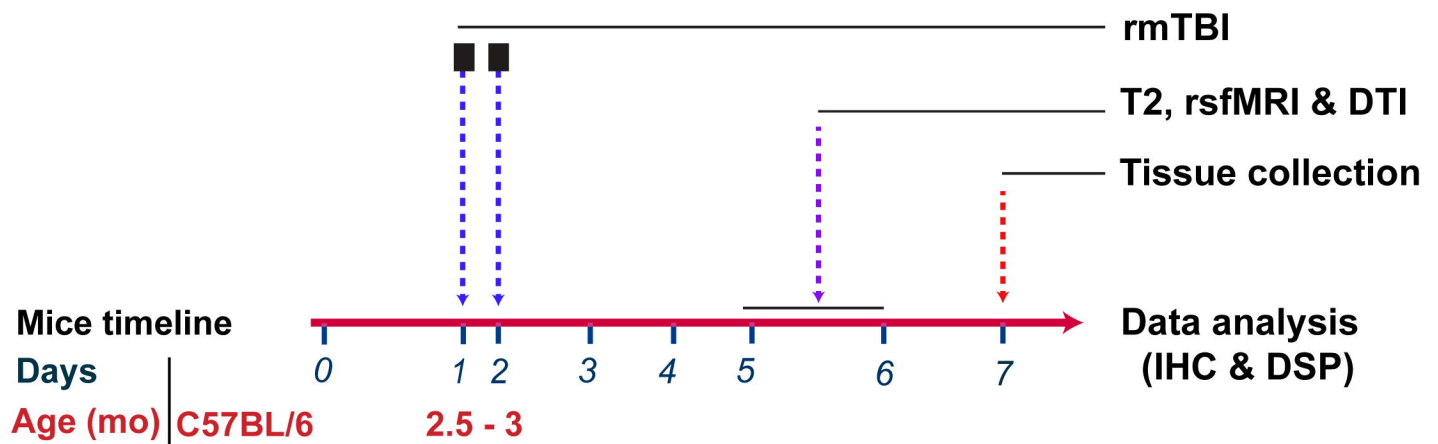

**Fig. 1. Study design.** Schematic representation showing the number of rmTBIs, rsfMRI and tissue collection. Brains were collected at 7 dpi for Immunohistochemistry (IHC) and nanostring GeoMx spatial protein profiling analyses.

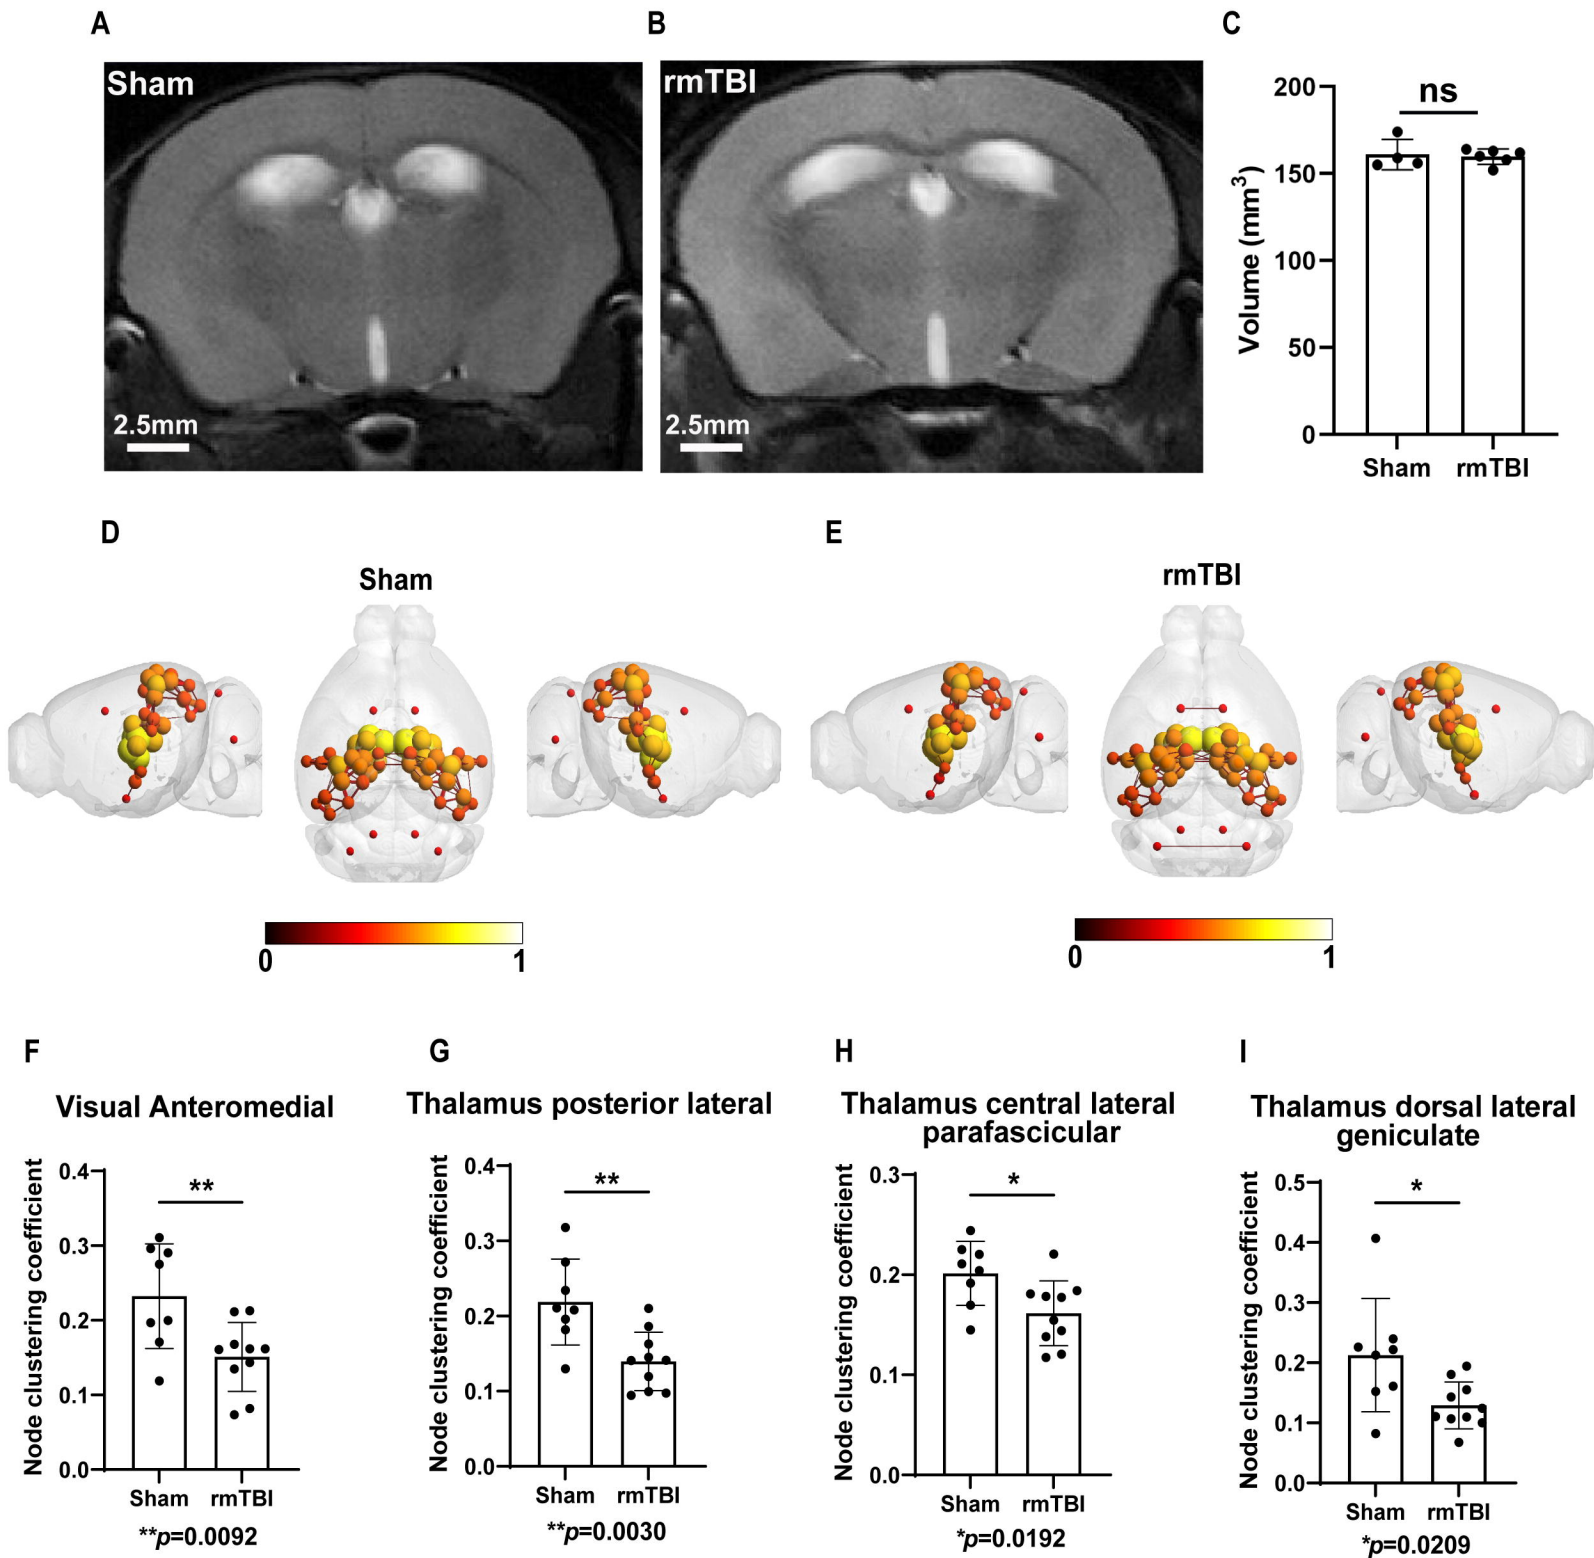

**Fig. 2. Clustering coefficient analysis reveals that the network integration and efficiency in specific brain regions are disrupted following rmTBI.** Representative T2-weighted anatomical brain images of sham and rmTBI mice (**A&B**) were used for brain volume analysis. Quantification of brain volume revealed no changes between sham and rmTBI groups (**C**). 3D functional connectome maps of sham and rmTBI mice brain shows the position of nodes and edges in the region of interest (ROIs) [total ROI = 64] (**D & E**). Clustering coefficient in various regions of thalamus and visual area (**F-I**) were significantly altered in rmTBI group compared to sham. Unpaired t-test, mean  $\pm$  SD, Sham (N= 8), rmTBI (N=10).

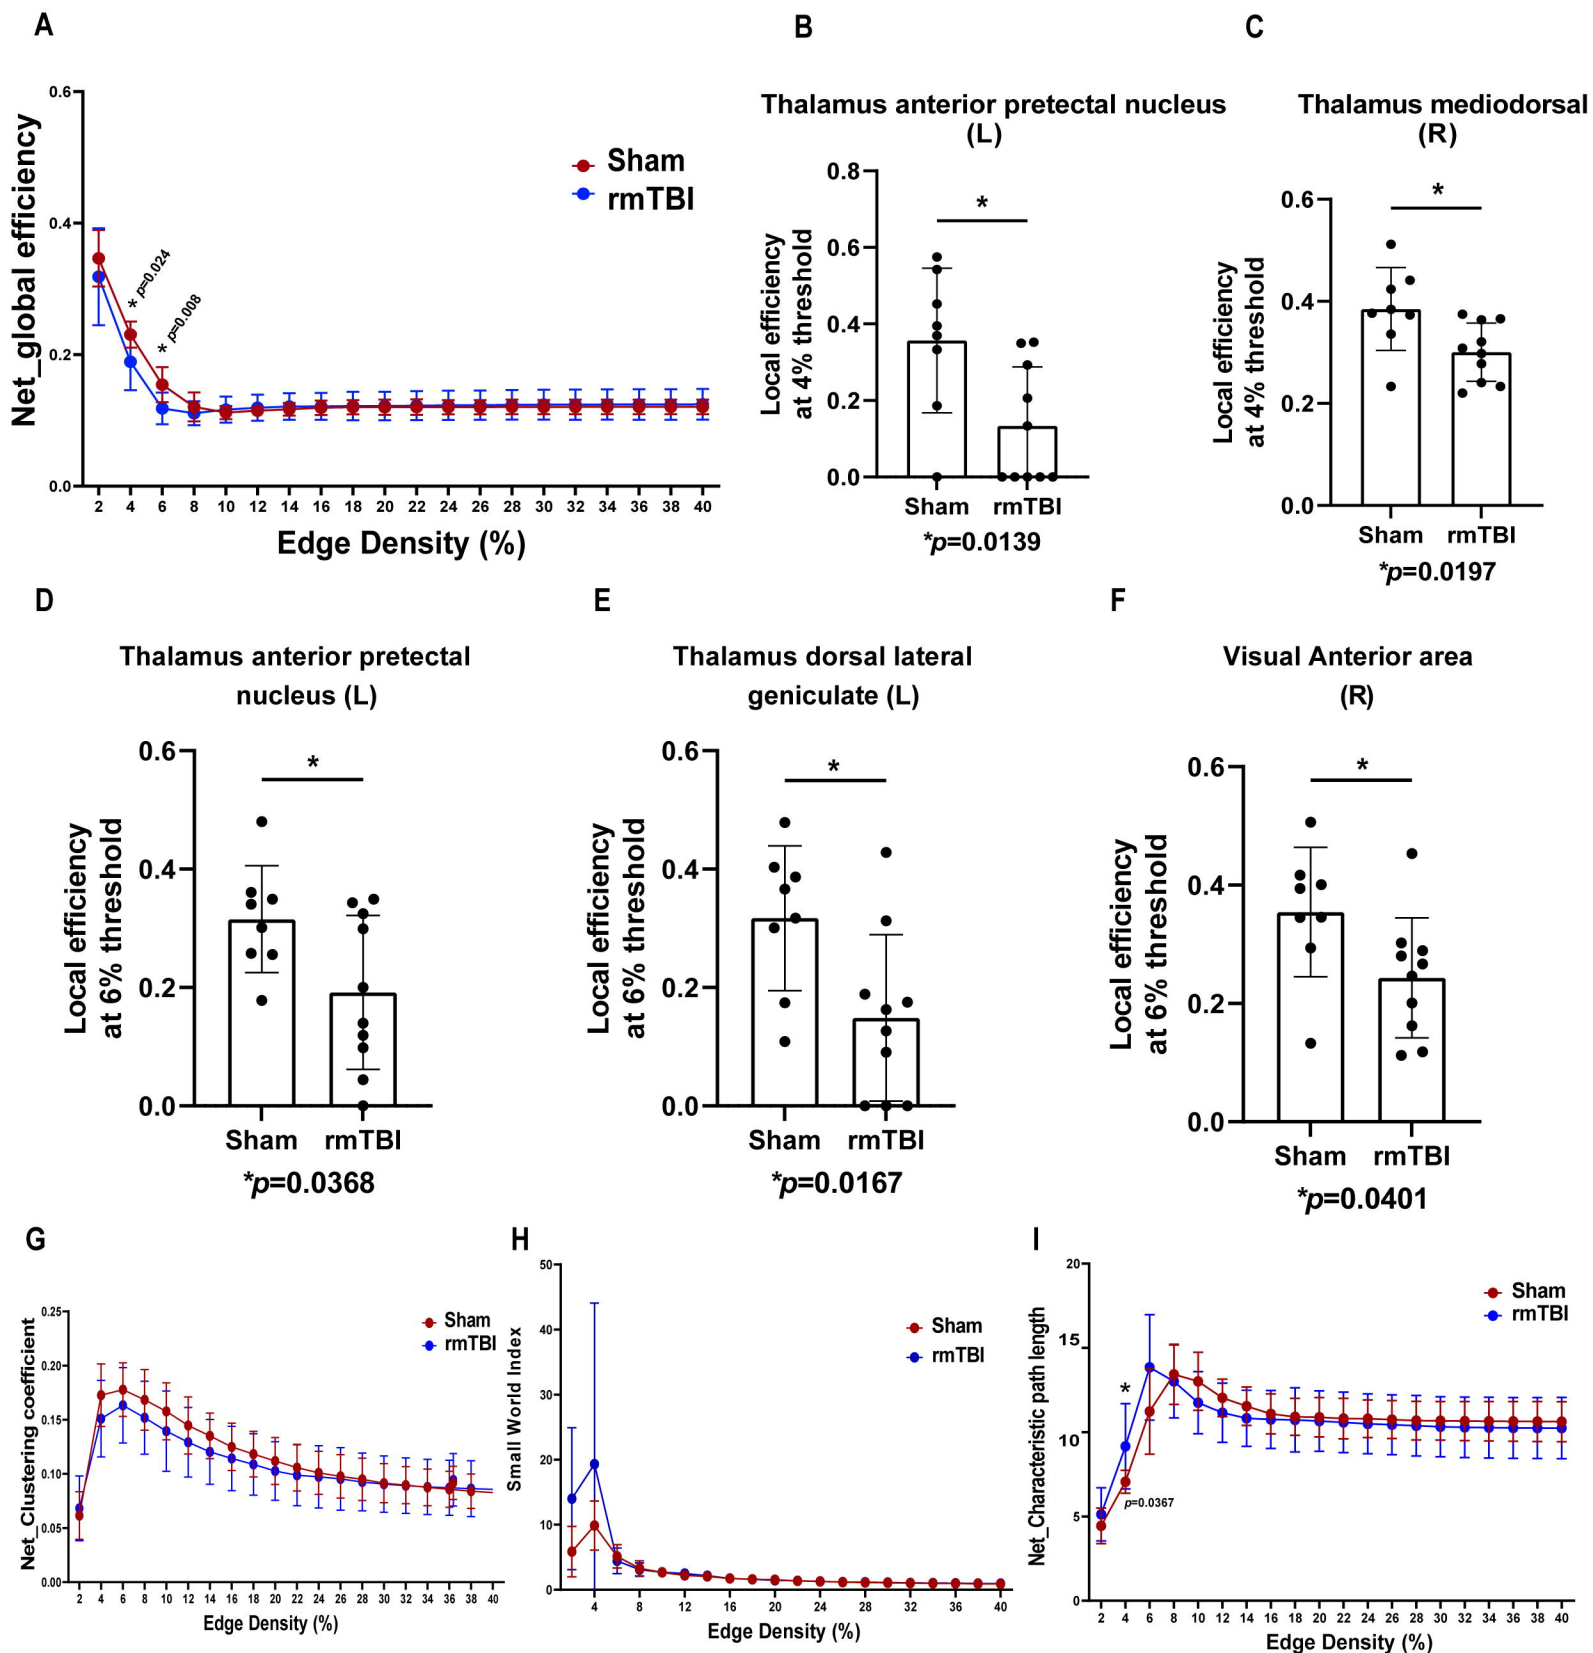

**Fig. 3. Global and Local efficiency analysis reveals that efficiency in specific brain regions are disrupted following rmTBI.** Global efficiency (**A**) was significantly decreased at the density threshold of 4% and 6% in rmTBI group compared to Sham. Local efficiency at 4% threshold (**B & C**) was significantly decreased in thalamus anterior prepectal nucleus (L) and thalamus mediodorsal (R) regions of injured mice. Similarly, Local efficiency at 6% threshold (**D-F**) was significantly decreased in thalamus anterior prepectal nucleus (L), thalamus dorsal lateral geniculate (L) and visual anterior area (R) of injured mice compared to Sham. No changes in global clustering coefficient (**G**) and small world index (**H**) were observed. The global characteristic pathlength (**I**) at 4% threshold was significantly increased in injured mice group compared to sham. The global metrics were analyzed by Multiple Unpaired t-test, mean  $\pm$  standard error at edge densities ranges 2 to 40%. The groups comparison was analyzed by Unpaired t-test, mean  $\pm$  SD, Sham (N= 8), rmTBI (N=10).

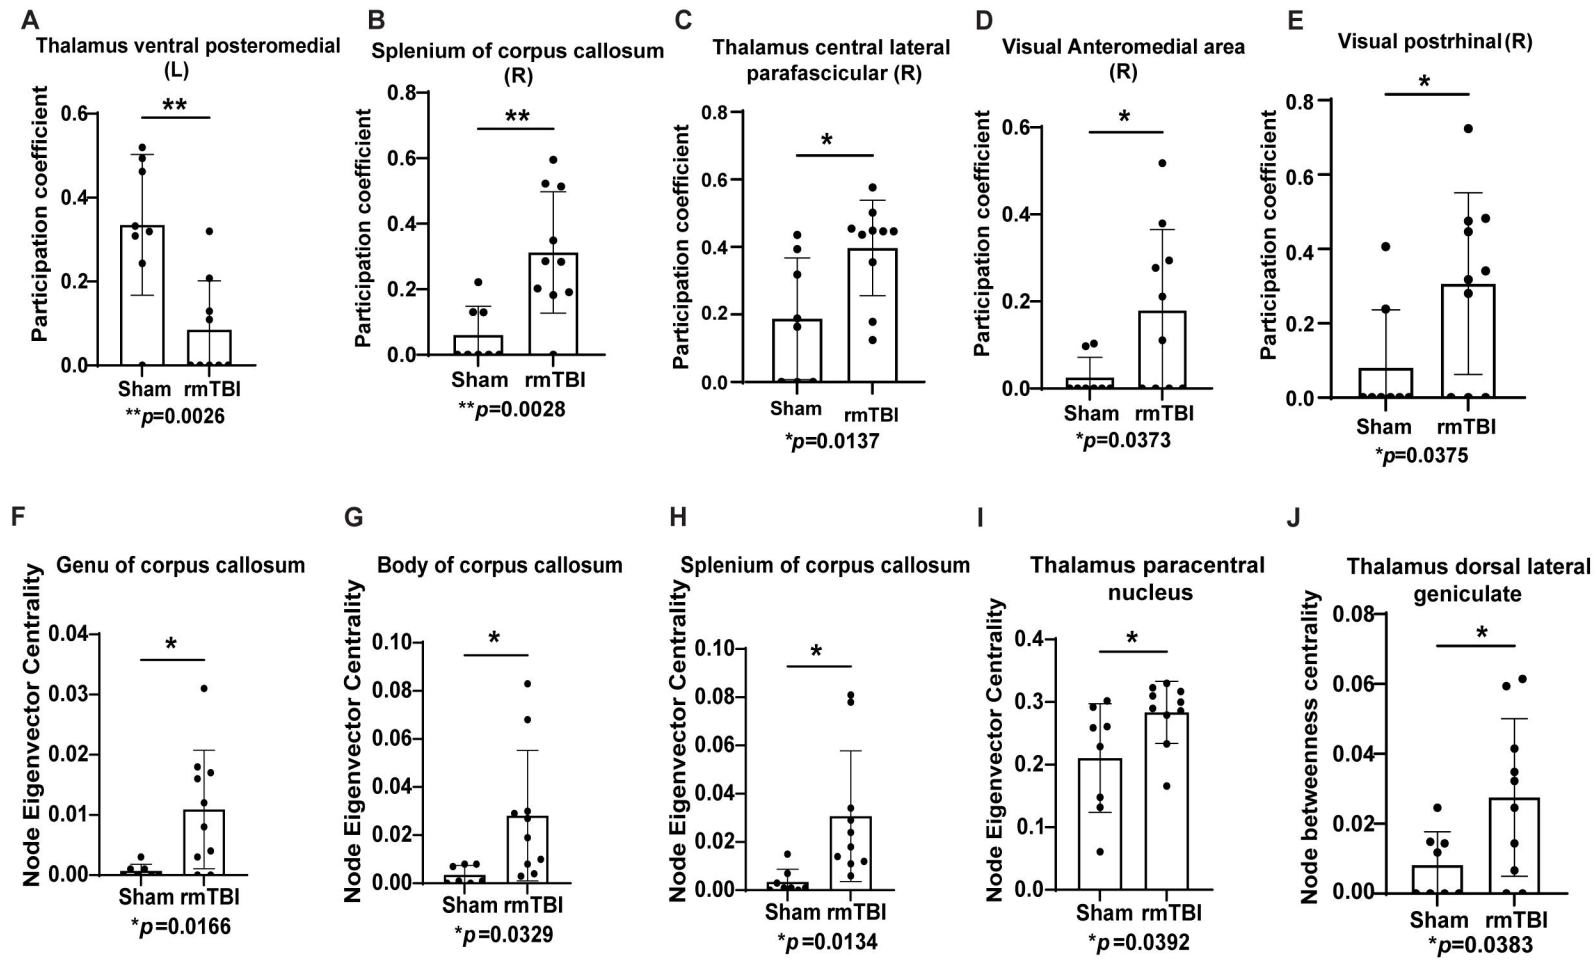

**Fig. 4. rmTBI disrupted connectivity between modules, increased eigenvector centrality and node betweenness centrality.** Nodes in left (L) thalamus ventral posteromedial (**A**) region had low participation coefficient, but it is significantly increased in the right (R) splenium of corpus callosum, thalamus (R) and visual regions (R) of rmTBI group relative to control (**B-E**). Increased eigenvector centrality shows increased high influence of specific nodes on connected networks following rmTBI in thalamic regions and corpus callosum (**F-I**). The node betweenness centrality shows the nodes at the intersection between shortest path in the specific thalamus region (**J**) was significantly altered. Density threshold at which the participation coefficient and node eigenvector centrality were calculated Unpaired t-test, mean  $\pm$  SD.

## ROI's selected for DTI analysis

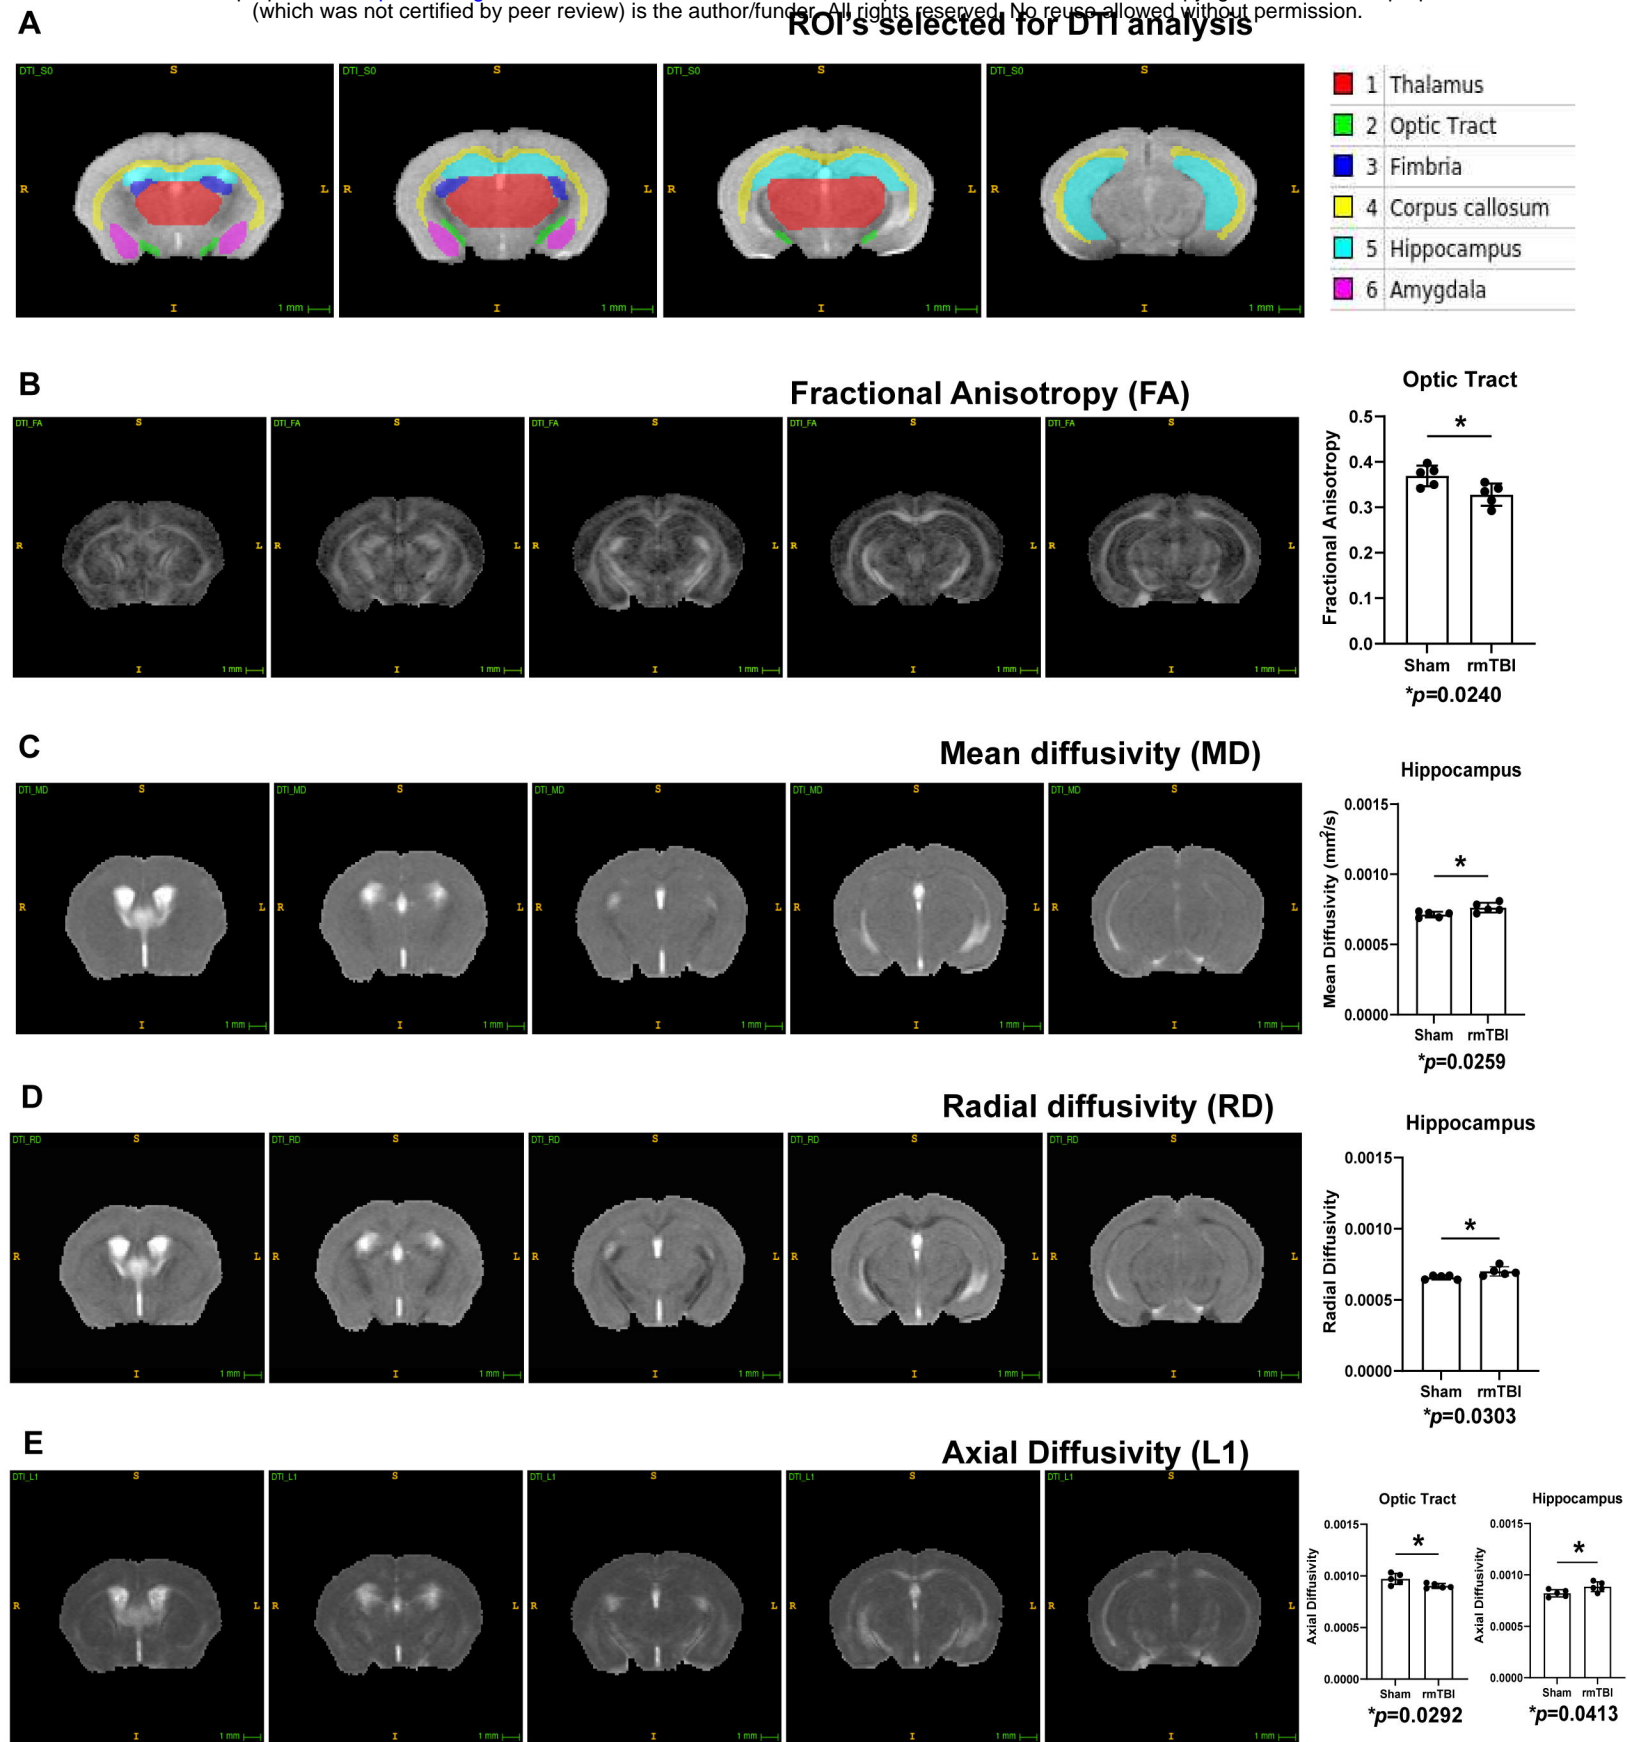

**Fig. 5. rmTBI altered tissue microstructure in specific brain regions.** Representative DTI brain image shows (A) ROIs selected for microstructure pattern analysis. rmTBI increased fractional anisotropy (FA) in the optic tract (B). Mean diffusivity (MD) and radial diffusivity (RD) were significantly increased in hippocampus of the injured mice (C&D). Axial diffusivity (L1) was significantly increased in the optic tract and hippocampus of the injured mice (E) compared to sham. Unpaired t-test, mean  $\pm$  SD.



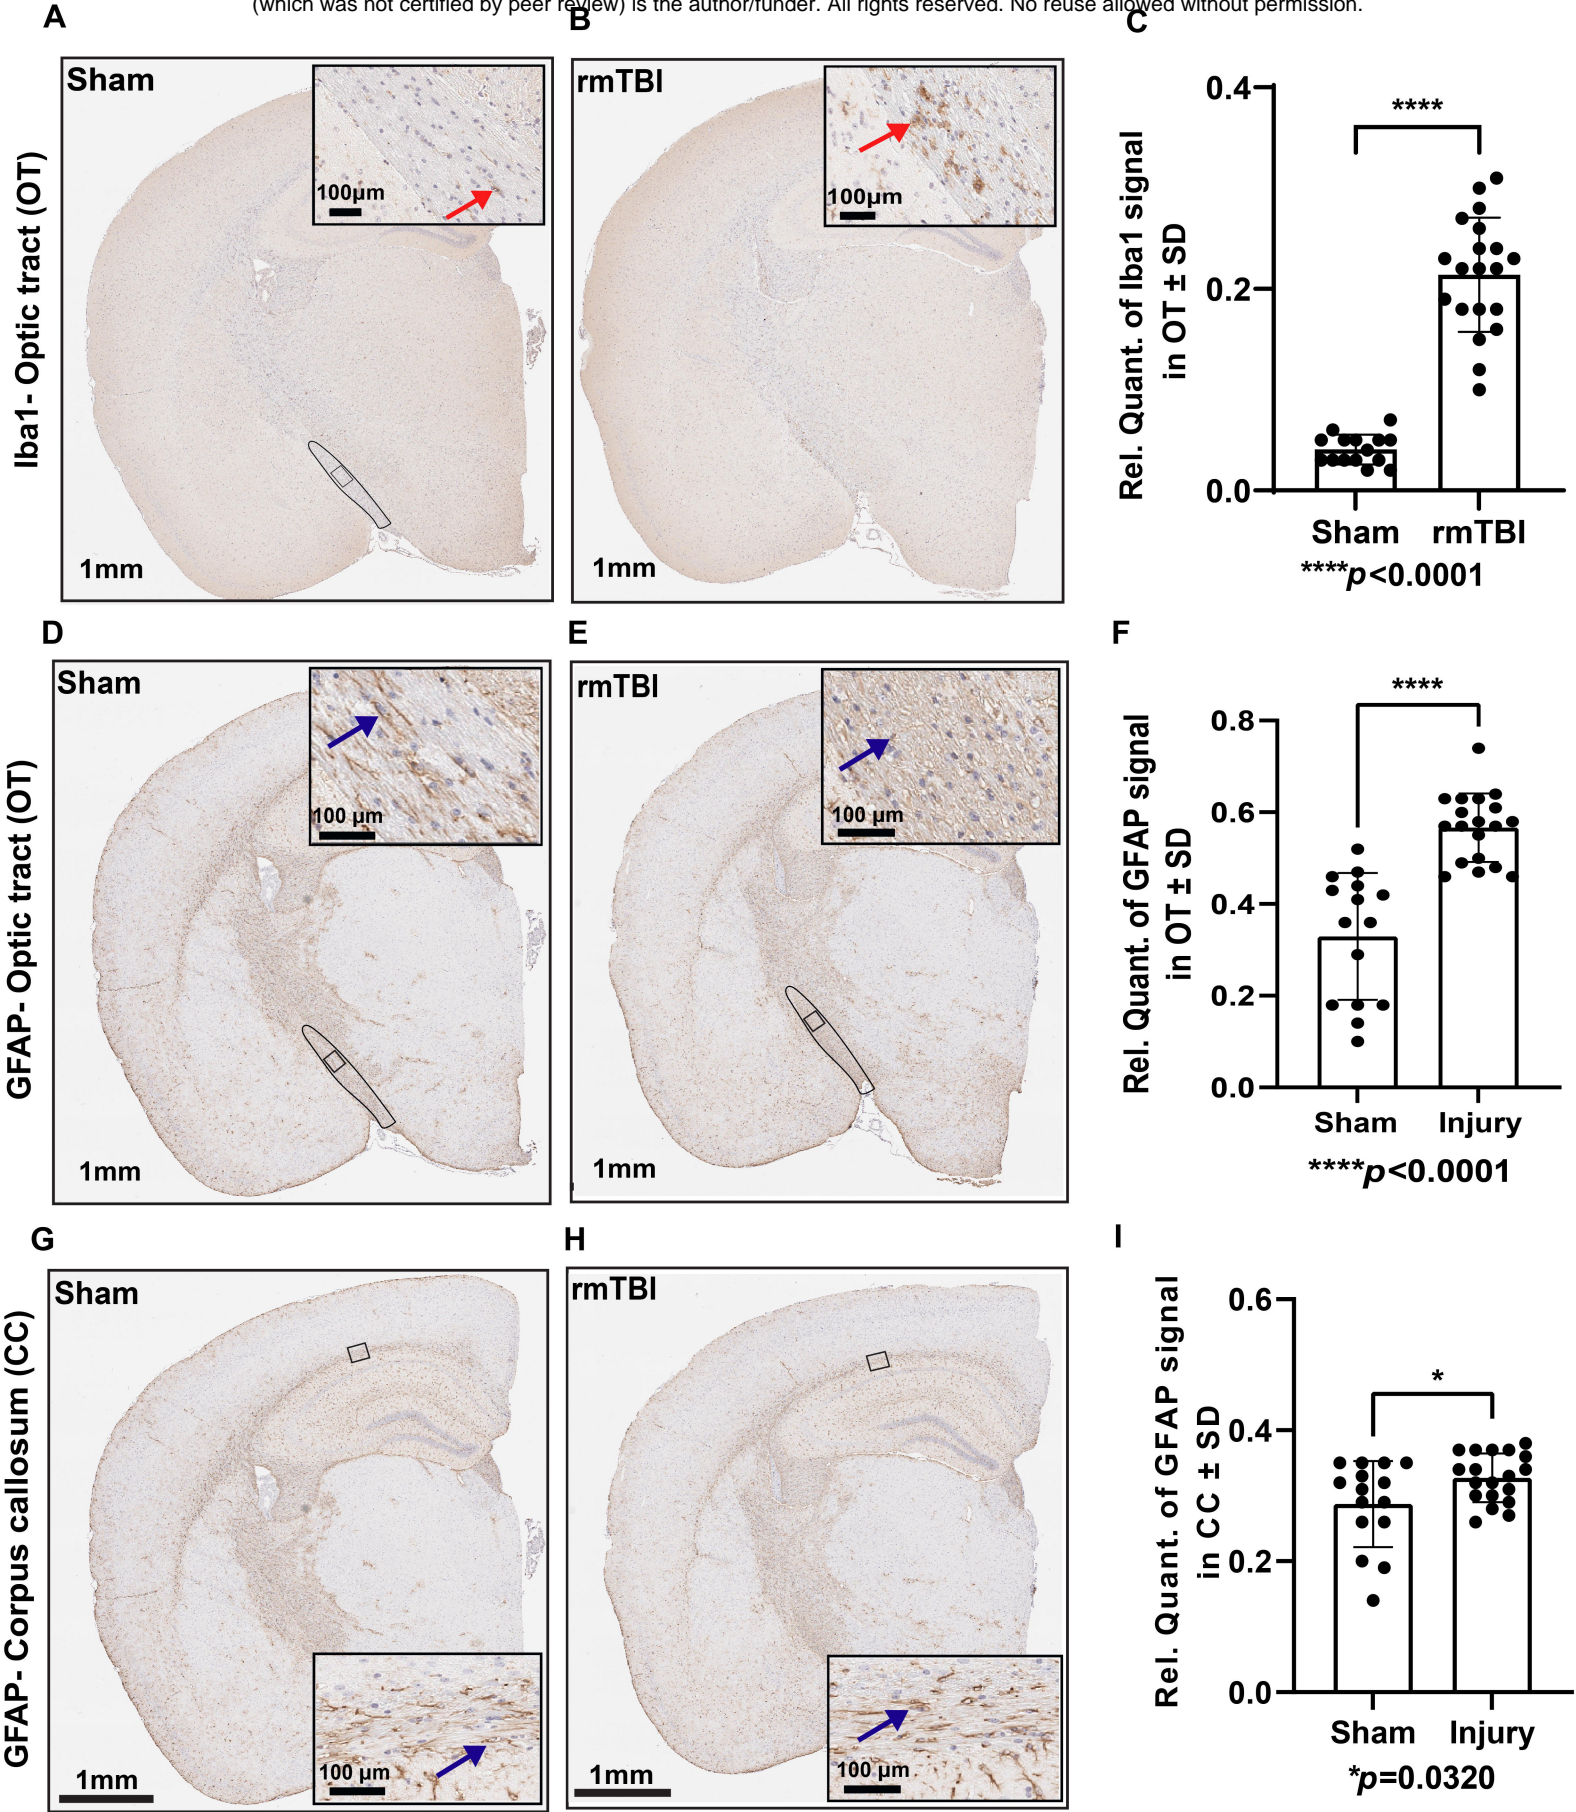

**Fig. 6. rmTBI induced gliosis in white matter tracts.** Iba1 expression was significantly increased in the optic tract of injured mice compared to sham (A-C). The red arrowhead indicates microglia. Brain coronal view: 1 mm; Scale bar for inset (enlarged view of the optic tract) = 100 µm. \*\*\*\* $p < 0.0001$ , Unpaired t-test; Sham (N= 15), rmTBI (N=20). GFAP expression was significantly increased in the optic tract (D-F) and corpus callosum (G-I) of injured mice compared to sham. The blue arrowhead indicates astrocytes. Brain coronal view: 1 mm; Scale bar for inset (enlarged view of the optic tract and corpus callosum) = 100 µm. (\*\*\*\* $p < 0.0001$ ; \* $p = 0.0320$ , Unpaired t-test), Sham (N= 15), rmTBI (N=19).

A

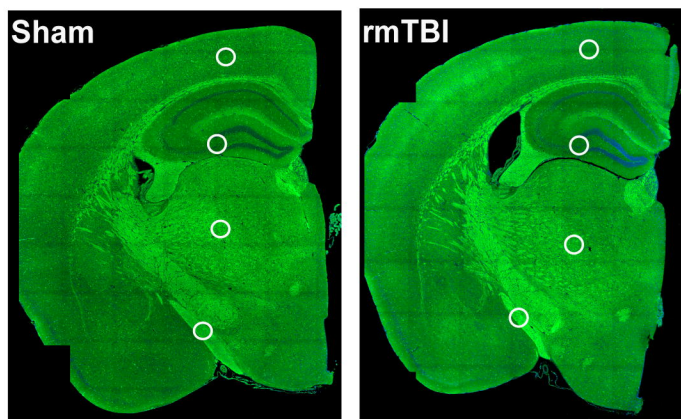

C  
Optic tract

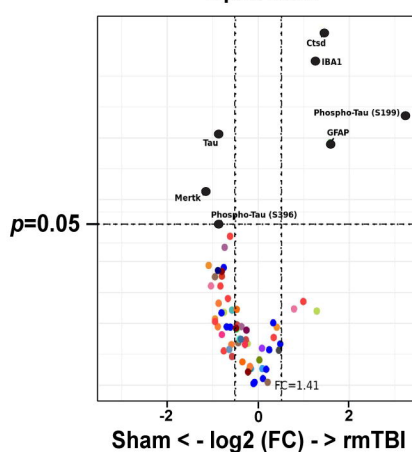

D  
Phospho-Tau (S199)

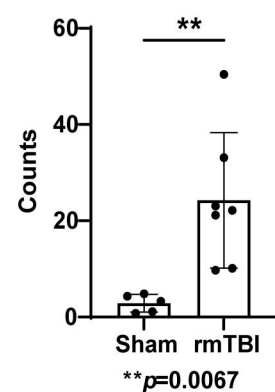

E

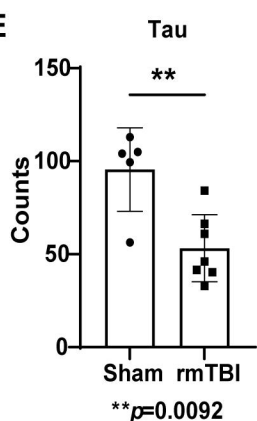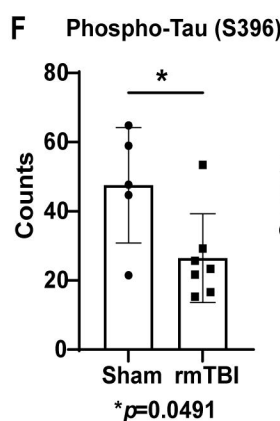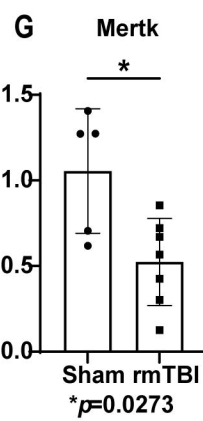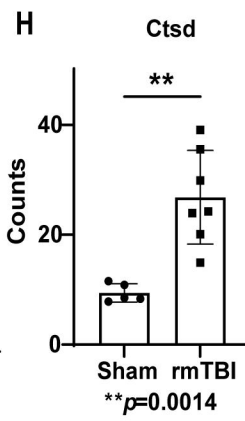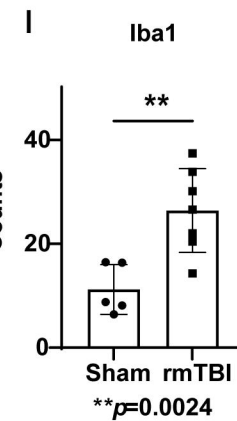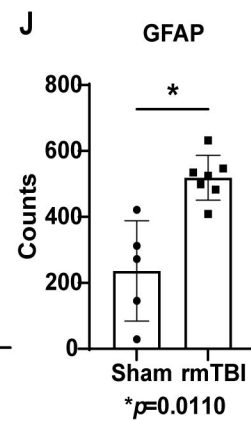

K

Thalamus

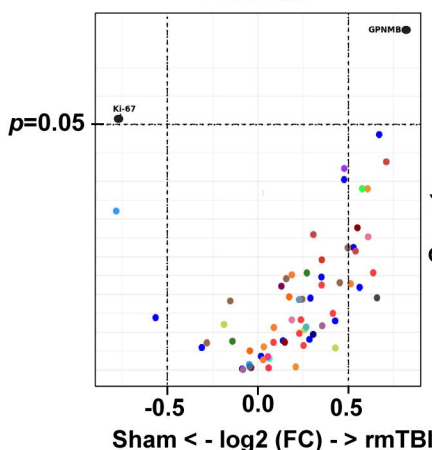

L

Ki-67

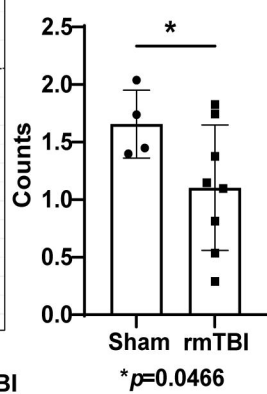

M

GPNMB

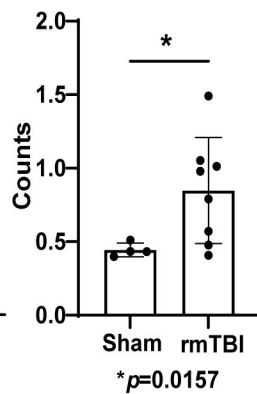

N

Primary Somatosensory Area

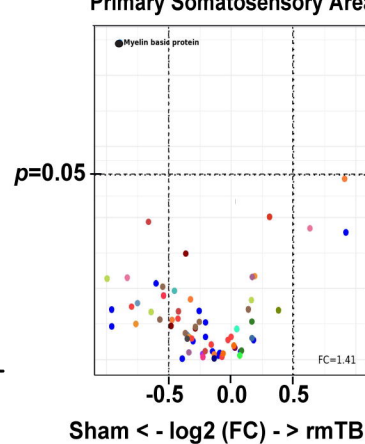

O

Myelin Basic Protein

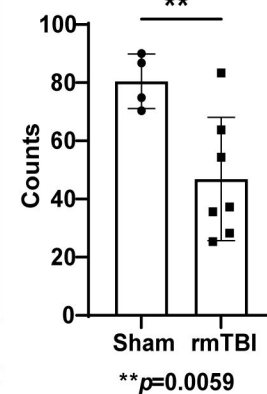

**Fig. 7. rmTBI increased the expression of disease associated proteins in white matter and grey matter regions.** Coronal sections of sham and rmTBI mice shows the region of interest (primary somatic sensory area, dentate gyrus polymorph layer, thalamus, and the optic tract) selected for NanoString GeoMx spatial protein profiling analysis (A&B). Volcano plots (C) and bar graphs (D-J) show significant alteration in the expression of Alzheimer's disease (AD) pathological markers, glial and neural cell markers in the optic tract of the injured mice. Volcano plot (K) and bar graphs show (L&M) significant changes in the expression of cell proliferation and AD associated, neuroinflammatory markers in the thalamus of the injured mice. Myelin basic protein was significantly decreased in the primary somatosensory area following rmTBI (N&O). Protein levels were normalized to the expression of house keeping proteins. Unpaired t-test, mean  $\pm$  SD, N=4-8.

**Table. 1**

| ROIs                       | Protein Biomarker    | Expression | Full target name                    | Cell profiling panel        | pvalue |
|----------------------------|----------------------|------------|-------------------------------------|-----------------------------|--------|
| Primary somatosensory area | Myelin basic protein | Down       | Myelin basic protein                | Neural Cell Profiling Core  | 0.0059 |
| Thalamus                   | GPNMB                | Up         | glycoprotein nmb                    | Glial cell subtyping module | 0.0157 |
|                            | Ki-67                | Down       | marker of proliferation Ki-67       | Neural Cell Profiling Core  | 0.0466 |
| Optic tract                | CTSD                 | Up         | cathepsin D                         | Glial cell subtyping module | 0.0014 |
|                            | Iba1                 | Up         | allograft inflammatory factor 1     | Neural Cell Profiling Core  | 0.0024 |
|                            | pTau(S199)           | Up         | microtubule-associated protein tau  | AD pathology extended       | 0.0067 |
|                            | GFAP                 | Up         | glial fibrillary acidic protein     | Neural Cell Profiling Core  | 0.0110 |
|                            | Tau                  | Down       | microtubule-associated protein tau  | AD pathology module         | 0.0092 |
|                            | MERTK                | Down       | MER proto-oncogene, tyrosine kinase | Glial cell subtyping module | 0.0273 |
|                            | pTau(S396)           | Down       | microtubule-associated protein tau  | AD pathology extended       | 0.0491 |

**Table.1.** Summary of the expression of various neuropathological markers following rmTBI identified through NanoString GeoMx spatial protein profiling analysis.
